# Supplementary material for: Transition metal-mediated B(4)–H hydroxylation/halogenation of o-carboranes bearing a 2-pyridylsulfenyl ligand
Source: Royal Society of Chemistry journal article supplement (doi:10.1039/d0cc08290b), 2021-01-01
Supplement: d0cc08290b1.pdf [file d0cc08290b1.pdf]

# **Transition metal-mediated Regioselective B(4)-H Hydroxylation/ Halogenation of *o*-carboranes Bearing a 2-pyridylsulfenyl Ligand**

Shu-Ting Guo, Peng-Fei Cui, Run-Ze Yuan and Guo-Xin Jin\*

State Key Laboratory of Molecular Engineering of Polymers, Shanghai Key Laboratory of Molecular Catalysis and Innovative Materials, Department of Chemistry, Fudan University, 2005 Songhu road, Shanghai, 200433 (P. R. China). E-mail: gxjin@fudan.edu.cn.

## **Contents**

|                                              |                |
|----------------------------------------------|----------------|
| <b>1. Experimental details.....</b>          | <b>S2-S8</b>   |
| <b>2. NMR spectra.....</b>                   | <b>S9-S28</b>  |
| <b>3. ESI-MS spectra.....</b>                | <b>S29-S35</b> |
| <b>4. X-ray crystallography details.....</b> | <b>S36-S45</b> |
| <b>5. References.....</b>                    | <b>S46</b>     |

## Experimental details :

### Materials:

All reagents and solvents were purchased from commercial sources (Sigma Aldrich and Adamas-beta) and used as supplied unless otherwise mentioned. Nondeuterated solvents were dried and distilled under N<sub>2</sub> from appropriate drying agents. The materials [Cp\**M*Cl<sub>2</sub>]<sub>2</sub> (*M* = Ir and Rh),<sup>1</sup> and 1-(2'-C<sub>5</sub>H<sub>4</sub>N)S-1,2-*o*-C<sub>2</sub>B<sub>10</sub>H<sub>10</sub><sup>2</sup> were prepared according to literature methods.

### Methods:

NMR spectra were recorded on Bruker AVANCE I 400 and VANCE-DMX 500 Spectrometers. <sup>1</sup>H NMR spectra and <sup>13</sup>C NMR spectra were recorded on Bruker AVANCE I 400 and AVANCE NEO 400 Spectrometers. Spectra were recorded at room temperature and referenced to the residual protonated solvent for NMR spectra. Proton chemical shift ( $\delta$  H = 7.26 (CDCl<sub>3</sub>)) and ( $\delta$  C = 77.16 (CDCl<sub>3</sub>)) are reported relative to the solvent residual peak. Coupling constants are expressed in Hertz. <sup>11</sup>B{<sup>1</sup>H} NMR (160 MHz) spectra were recorded with a Bruker AVANCE III HD spectrometer. Elemental analyses were performed on an Elementar Vario EL III analyzer. IR spectra of the solid samples (KBr tablets) in the range 400-4000 cm<sup>-1</sup> were recorded on a Nicolet AVATAR360IR spectrometer. Mass spectra were obtained with a Micro TOF II mass spectrometer using electrospray ionization.

### Experimental Section:

#### Synthesis of compound 1b

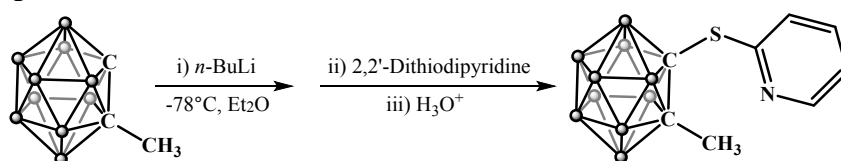

A suspension of *n*-BuLi (1.6 mol/L in *n*-hexane, 0.65 ml, 1.0 mmol) was added to a solution of *o*-CH<sub>3</sub>-carborane (158.2 mg, 1 mmol) in diethyl ether 6 ml at -78 °C over a period of 3 h, then 2,2'-Dithiodipyridine (440.62 mg, 2 mmol) was added at room temperature and the resulting mixture was stirred for 12h. The reaction mixture was quenched with dilute HCl and the organic phase was separated and the water phase extracted with diethyl ether (3 × 10 mL). The solvent was then removed under vacuo and the residue was purified by column chromatography on silica gel (CH<sub>2</sub>Cl<sub>2</sub>/*n*-hexane= 1:4). A white solid was obtained and dried under vacuum to give the compound **1b** (yield: 201.2 mg, 75%). <sup>1</sup>H NMR (400 MHz; CDCl<sub>3</sub>, ppm):  $\delta$  = 2.293 (s, 3H, CH<sub>3</sub>-H), 7.420 (ddd, *J* = 7.6, 3.2, 0.4 Hz, 1H, Py-H), 7.697 (dt, *J* = 8, 0.8 Hz, 1H, Py-H), 7.784 (td, *J* = 7.6, 1.6 Hz, 1H, Py-H), 8.664 (ddd, *J* = 4.4, 1.6, 0.8 Hz, 1H, Py-H). <sup>13</sup>C{<sup>1</sup>H} NMR (101 MHz; CDCl<sub>3</sub>, ppm):  $\delta$  = 23.84 (CH<sub>3</sub>-C), 79.60, 88.66 (cage C), 125.40, 132.50, 138.03, 151.00, 152.59 (Py-C). <sup>11</sup>B{<sup>1</sup>H} NMR (160 MHz, CDCl<sub>3</sub>, ppm):  $\delta$  = -9.89 (6B), -8.67 (2B), -4.79 (1B), -3.47 (1B). IR (KBr, disk):  $\nu$  (B-H) = 2587 cm<sup>-1</sup>. Anal. calcd for compound **1b** (C<sub>8</sub>H<sub>17</sub>B<sub>10</sub>SN): C, 35.82; H, 6.39; N, 5.22. Found: C, 35.98; H, 6.81; N, 4.99. ESI-MS: *m/z* = 268.219 (calcd for [M+H]<sup>+</sup> 268.219).

#### Synthesis of compound 1c

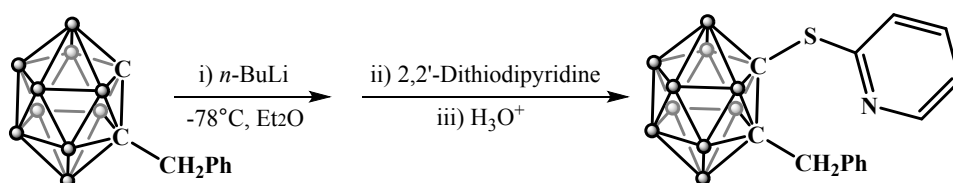

A suspension of *n*-BuLi (1.6 mol/L in *n*-hexane, 0.65 ml, 1.0 mmol) was added to a solution of *o*-CH<sub>2</sub>Ph-carborane (237.2 mg, 1 mmol) in ether 6 ml at -78 °C over a period of 3 h, then 2,2'-Dithiodipyridine (440.62 mg, 2 mmol) was added at room temperature and the resulting mixture was stirred for 12h. The reaction mixture was quenched with dilute HCl and the organic phase was separated and the water phase extracted with diethyl ether (3 × 10 mL). The solvent was then removed under vacuo and the residue was purified by column chromatography on silica gel (CH<sub>2</sub>Cl<sub>2</sub>/*n*-hexane= 1:4). A white solid was obtained and dried under vacuum to give the compound **1c** (yield: 276.2 mg, 80%). <sup>1</sup>H NMR (400 MHz; CDCl<sub>3</sub>, ppm): δ = 3.958 (s, 2H, CH<sub>2</sub>-H), 7.325 (m, 5H, Ph-H), 7.439 (dd, *J* = 6.4 Hz, 1.6H, Py-H), 7.808 (m, 2H, Py-H), 8.731 (dd, *J* = 5.2, 1.2 Hz, 1H, Py-H). <sup>13</sup>C{<sup>1</sup>H} NMR (101 MHz; CDCl<sub>3</sub>, ppm): δ = 40.83 (CH<sub>2</sub>-C), 83.35, 84.33 (cage C), 125.55, 132.43, 138.11, 150.94, 152.41 (Py-C), 127.83, 128.52, 130.55, 136.10 (Ph-C). <sup>11</sup>B{<sup>1</sup>H} NMR (160 MHz, CDCl<sub>3</sub>, ppm): δ = -10.89 (4B), -9.87 (2B), -9.08 (2B), -3.97 (2B). Anal. calcd for compound **1c** (C<sub>14</sub>H<sub>23</sub>B<sub>10</sub>SN): C, 48.67; H, 6.71; N, 4.05. Found: C, 48.93; H, 7.21; N, 3.95. ESI-MS: *m/z* = 334.24 (calcd for [M+H]<sup>+</sup> 334.24).

### Synthesis of compound 1d

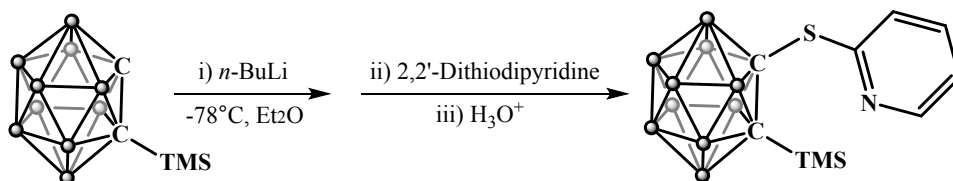

A suspension of *n*-BuLi (1.6 mol/L in *n*-hexane, 0.65 ml, 1.0 mmol) was added to a solution of *o*-TMS-carborane (216.4 mg, 1 mmol) in ether 6 ml at -78 °C over a period of 3 h, then 2,2'-Dithiodipyridine (440.62 mg, 2 mmol) was added at room temperature and the resulting mixture was stirred for 12h. The reaction mixture was quenched with dilute HCl and the organic phase was separated and the water phase extracted with diethyl ether (3 × 10 mL). The solvent was then removed under vacuo and the residue was purified by column chromatography on silica gel (CH<sub>2</sub>Cl<sub>2</sub>/*n*-hexane= 1:4). A white solid was obtained and dried under vacuum to give the compound **1d** (yield: 250.6 mg, 77%). <sup>1</sup>H NMR (400 MHz; CDCl<sub>3</sub>, ppm): δ = 0.444 (s, 9H, TMS-H), 7.368 (ddd, *J* = 6, 4.8, 1.2 Hz, 1H, Py-H), 7.626 (d, *J* = 8 Hz, 1H, Py-H), 7.745 (td, *J* = 7.6, 2 Hz, 1H, Py-H), 8.668 (d, *J* = 4.4, 2 Hz, 1H, Py-H). <sup>13</sup>C{<sup>1</sup>H} NMR (101 MHz; CDCl<sub>3</sub>, ppm): δ = 0.79 (TMS-C), 79.15, 79.56 (cage C), 125.01, 131.73, 137.64, 150.87, 152.60 (Py-C). <sup>11</sup>B{<sup>1</sup>H} NMR (160 MHz, CDCl<sub>3</sub>, ppm): δ = -10.48 (4B), -7.37 (4B), -2.84 (1B), -0.05 (1B). IR (KBr, disk): *ν* (B-H) = 2599 cm<sup>-1</sup>. Anal. calcd for compound **1d** (C<sub>10</sub>H<sub>23</sub>B<sub>10</sub>SNSi): C, 36.89; H, 7.12; N, 4.30. Found: C, 36.93; H, 7.51; N, 4.99.

### Synthesis of *o*-carborane complex 2

To a solution of ligand **1a** (25.3 mg, 0.1 mmol) in CH<sub>2</sub>Cl<sub>2</sub> (6 mL), AgOTf (51.4 mg, 0.2 mmol), [Cp\*IrCl<sub>2</sub>]<sub>2</sub> (40.0 mg, 0.05 mmol), and CH<sub>3</sub>COOK (0.1mmol, 10mg) were added and

the mixture was stirred for an additional 3 days. The obtained suspension was filtered. The filtrate was concentrated under vacuum and purified by column chromatography using silica gel (CH<sub>2</sub>Cl<sub>2</sub>/EA/*n*-hexane= 1:1:4). An orange solution was obtained, and evaporation of the volatiles under vacuum gave the complex **2** (yield: 40.6 mg, 68%). <sup>1</sup>H NMR (400 MHz; CDCl<sub>3</sub>, ppm): δ = 1.505 (s, 15H, Cp\*-H), 3.595 (s, 1H, Cage C-H), 7.241 (t, J = 1.6 Hz, 1H, Py-H), 7.573 (dd, J = 8, 1.2 Hz, 1H, Py-H), 7.689 (td, J = 7.6, 1.2 Hz, 1H, Py-H), 9.529 (dd, J = 6, 1.6 Hz, 1H, Py-H). <sup>11</sup>B{<sup>1</sup>H} NMR (160 MHz, CDCl<sub>3</sub>, ppm): δ = -11.84 (2B), -9.87 (1B), -7.33 (2B), -6.24 (1B), -5.12 (2B), -3.83 (1B), -2.56 (1B). IR (KBr, disk): ν (B-H) = 2596 cm<sup>-1</sup>. Anal. calcd for complex **2** (C<sub>17</sub>H<sub>29</sub>B<sub>10</sub>IrNCIS): C, 33.19; H, 4.75; N, 2.28. Found: C, 33.62; H, 5.20; N, 2.60.

### Synthesis of *o*-carborane complex **3**

To a solution of compound **1b** (26.8 mg, 0.1 mmol) in CH<sub>2</sub>Cl<sub>2</sub> (6 mL), AgOTf (51.4 mg, 0.2 mmol), [Cp\*IrCl<sub>2</sub>]<sub>2</sub> (40.0 mg, 0.05 mmol), and CH<sub>3</sub>COOK (0.1 mmol, 10 mg) were added and the mixture was stirred for an additional 3 days. The obtained suspension was filtered. The filtrate was concentrated under vacuum and purified by column chromatography using silica gel (CH<sub>2</sub>Cl<sub>2</sub>/EA/*n*-hexane= 1:1:2). An orange solution was obtained, and evaporation of the volatiles under vacuum gave the complex **3** (yield: 45.9 mg, 73%). <sup>1</sup>H NMR (400 MHz; CDCl<sub>3</sub>, ppm): δ = 1.514 (s, 15H, Cp\*-H), 1.951 (s, 1H, CH<sub>3</sub>-H), 7.199 (td, J = 6.0, 1.2 Hz, 1H, Py-H), 7.461 (d, J = 6.8 Hz, 1H, Py-H), 7.620 (td, J = 7.6, 1.2 Hz, 1H, Py-H), 9.607 (dd, J = 5.6, 1.2 Hz, 1H, Py-H). <sup>13</sup>C{<sup>1</sup>H} NMR (101 MHz; CDCl<sub>3</sub>, ppm): δ = 8.96 (Cp\*-C), 15.52 (CH<sub>3</sub>-C), 23.84, 29.85 (cage C), 90.37 (Cp\*-C), 125.16, 128.55, 137.12, 157.13, 160.46 (Py-C). <sup>11</sup>B{<sup>1</sup>H} NMR (160 MHz, CDCl<sub>3</sub>, ppm): δ = -10.63 (4B), -8.95 (1B), -7.83 (1B), -6.59 (1B), -5.05 (1B), -3.54 (2B). IR (KBr, disk): ν (B-H) = 2565 cm<sup>-1</sup>. Anal. calcd for complex **3** (C<sub>18</sub>H<sub>31</sub>B<sub>10</sub>IrNCIS): C, 43.35; H, 4.97; N, 2.22. Found: C, 43.72; H, 5.42; N, 2.41.

### Synthesis of *o*-carborane complex **4**

To a solution of compound **1a** (25.3 mg, 0.1 mmol) in CH<sub>2</sub>Cl<sub>2</sub> (6 mL), AgOTf (51.4 mg, 0.2 mmol), [Cp\*RhCl<sub>2</sub>]<sub>2</sub> (30.9 mg, 0.05 mmol), and CH<sub>3</sub>COOK (0.1 mmol, 10 mg) were added and the mixture was stirred in N<sub>2</sub> atmosphere for an additional 3 days. The obtained suspension was filtered. The filtrate was concentrated under vacuum and purified by column chromatography using silica gel (CH<sub>2</sub>Cl<sub>2</sub>/EA/*n*-hexane= 1:1:2). An orange solution was obtained, and evaporation of the volatiles under vacuum gave the complex **4** (yield: 18.8 mg, 39%). <sup>1</sup>H NMR (400 MHz; CDCl<sub>3</sub>, ppm): δ = 2.090 (s, 15H, Cp\*-H), 7.385 (ddd, J = 6, 5.2, 1.2 Hz, 1H, py-H), 7.433 (d, J = 7.6 Hz, 1H, Py-H), 7.769 (td, J = 8, 2 Hz, 1H, Py-H), 8.624 (dd, J = 4.8, 1.2 Hz, 1H, Py-H). <sup>13</sup>C{<sup>1</sup>H} NMR (101 MHz; CDCl<sub>3</sub>, ppm): δ = 9.83 (Cp\*-C), 63.10, 63.22 (cage C), 104.62 (Cp\*-C), 124.58, 133.07, 137.17, 150.27, 154.97 (Py-C). <sup>11</sup>B{<sup>1</sup>H} NMR (160 MHz, CDCl<sub>3</sub>, ppm): δ = -21.19 (1B), -18.16 (1B), -16.59 (1B), -10.62

(1B), -7.68 (1B), -3.02 (1B), -1.00 (1B), 0.31 (1B), 9.40 (1B). Anal. calcd for complex **4** (C<sub>17</sub>H<sub>29</sub>B<sub>9</sub>SNRh): C, 42.57; H, 6.09; N, 2.92. Found: C, 43.03; H, 6.55; N, 3.18.

### Synthesis of *o*-carborane complex **5**

To a solution of compound **1b** (26.8 mg, 0.1 mmol) in CH<sub>2</sub>Cl<sub>2</sub> (6 mL), AgOTf (51.4 mg, 0.2 mmol), [Cp\*RhCl<sub>2</sub>]<sub>2</sub> (30.9 mg, 0.05 mmol), and CH<sub>3</sub>COOK (0.1 mmol, 10 mg) were added and the mixture was stirred for an additional 3 days. The obtained suspension was filtered. The filtrate was concentrated under vacuum and purified by column chromatography using silica gel (CH<sub>2</sub>Cl<sub>2</sub>/EA/*n*-hexane = 1:1:2). An orange solution was obtained, and evaporation of the volatiles under vacuum gave the complex **5** (yield: 23.2 mg, 43%). <sup>1</sup>H NMR (400 MHz; CDCl<sub>3</sub>, ppm): δ = 1.489 (s, 15H, Cp\*-H), 1.29-3.24 (br, 9H, B-H), 1.955 (s, 1H, CH<sub>3</sub>-H), 5.19 (s, 1H, CH), 9.772 (dd, J = 5.6, 1.6 Hz, 1H, Py-H), 7.660 (td, J = 7.6, 2 Hz, 1H, Py-H), 7.441 (d, J = 6.4 Hz, 1H, Py-H), 7.292 (td, J = 7.2, 1.2 Hz, 1H, Py-H). <sup>13</sup>C{<sup>1</sup>H} NMR (101 MHz; CDCl<sub>3</sub>, ppm): δ = 9.36 (Cp\*-C), 23.70 (CH<sub>3</sub>-C), 52.47, 82.03 (cage C), 97.34 (Cp\*-C), 124.24, 128.21, 137.47, 157.33, 159.56 (Py-C). <sup>11</sup>B{<sup>1</sup>H} NMR (160 MHz, CDCl<sub>3</sub>, ppm): δ = -11.33 (1B), -10.23 (3B), -8.75 (1B), -7.26 (1B), -5.56 (1B), -3.22 (2B), 2.99 (1B). IR (KBr, disk): ν (B-H) = 2597 cm<sup>-1</sup>. Anal. calcd for complex **5** (C<sub>18</sub>H<sub>31</sub>B<sub>10</sub>RhNClS): C, 40.03; H, 5.79; N, 2.59. Found: C, 40.50; H, 6.19; N, 2.92.

### Synthesis of *o*-carborane complex **6**

Method 1: NBS (10.7 mg, 0.06 mmol) and AgOTf (12.9 mg, 0.05 mmol) were added to the complex **5** (27 mg, 0.05 mmol) in DCE (Dichloroethane). The reaction mixture was stirred for 24 h at 65 °C then filtered. The filtrate was concentrated and further purified via silica gel chromatography (CH<sub>2</sub>Cl<sub>2</sub>/*n*-hexane = 2: 5). White solids were obtained and dried under vacuo to give the complex **6**: (yield: 15.8 mg, 91%).

Method 2: To a solution of ligand **1b** (26.8 mg, 0.1 mmol) in DCE (6 mL), AgOTf (51.4 mg, 0.2 mmol), [Cp\*RhCl<sub>2</sub>]<sub>2</sub> (30.9 mg, 0.05 mmol), NBS (17.8 mg, 0.1 mmol) and CH<sub>3</sub>COONa (0.1 mmol, 9 mg) were added and the mixture was stirred for 12 h at 65 °C. The obtained suspension was filtered. The filtrate was concentrated under vacuum and purified by column chromatography using silica gel (CH<sub>2</sub>Cl<sub>2</sub>/*n*-hexane = 2: 3). A colorless solution was obtained, and evaporation of the volatiles under vacuum gave the complex **6** (yield: 32.9 mg, 95%).

<sup>1</sup>H NMR (400 MHz; CDCl<sub>3</sub>, ppm): δ = 2.366 (s, H, CH<sub>3</sub>-H), 7.415 (m, 1H, Py-H), 7.801 (m, J = 1.6 Hz, 1H, Py-H), 8.672 (d, J = 5.2 Hz, 1H, Py-H). <sup>13</sup>C{<sup>1</sup>H} NMR (101 MHz; CDCl<sub>3</sub>, ppm): δ = 24.03 (CH<sub>3</sub>-C), 81.00, 81.36 (cage C), 125.57, 133.15, 138.01, 151.01, 152.02 (Py-C). <sup>11</sup>B{<sup>1</sup>H} NMR (160 MHz, CDCl<sub>3</sub>, ppm): δ = -13.27 (1B), -10.62 (3B), -9.01 (3B), -5.29 (1B), -3.91 (1B), -3.09 (1B). ESI-MS: m/z = 347.12 (calcd for [M+H]<sup>+</sup> 347.12).

### Synthesis of *o*-carborane complex **7**

Method 1: NIS (13.5 mg, 0.06 mmol) and AgOTf (12.9 mg, 0.05 mmol) were added to the complex **5** (27 mg, 0.05 mmol) in DCE. The reaction mixture was stirred for 24h at 65 °C then filtered. The filtrate was concentrated and further purified via silica gel chromatography (CH<sub>2</sub>Cl<sub>2</sub>/*n*-hexane= 2: 5). White oil were obtained and dried under vacuo to give the complex **7**: (yield:16.4 mg, 83%).

Method 2: To a solution of ligand **1b** (26.8 mg, 0.1 mmol) in DCE (Dichloroethane) (6 mL), AgOTf (51.4 mg, 0.2 mmol), [Cp\*RhCl<sub>2</sub>]<sub>2</sub> (30.9 mg, 0.05 mmol), NIS (22.5mg, 0.1mmol) and CH<sub>3</sub>COONa (0.1mmol, 9mg) were added and the mixture was stirred for 12h at 65 °C. The obtained suspension was filtered. The filtrate was concentrated under vacuum and purified by column chromatography using silica gel (CH<sub>2</sub>Cl<sub>2</sub>/*n*-hexane= 2: 3). A colorless solution was obtained, and evaporation of the volatiles under vacuum gave the complex **7** (yield: 33.8 mg, 86%).

<sup>1</sup>H NMR (400 MHz; CDCl<sub>3</sub>, ppm): δ = 2.360 (s, H, CH<sub>3</sub>-H), 7.420 (m, 1H, Py-H), 7.809 (m, 1H, Py-H), 8.668 (ddd, J = 4.8, 2, 1.2 Hz, 1H, Py-H). <sup>13</sup>C{<sup>1</sup>H} NMR (101 MHz; CDCl<sub>3</sub>, ppm): δ = 23.34 (CH<sub>3</sub>-C), 80.75, 81.34 (cage C), 125.59, 133.06, 138.02, 151.05, 152.32 (Py-C). <sup>11</sup>B{<sup>1</sup>H} NMR (160 MHz, CDCl<sub>3</sub>, ppm): δ = -19.74 (1B), -11.28 (1B), -9.58 (2B), -8.03 (2B), -2.81 (1B), -2.32 (1B). ESI-MS: m/z = 394.11 (calcd for [M+H]<sup>+</sup> 394.11).

### Synthesis of *o*-carborane complex **6c**

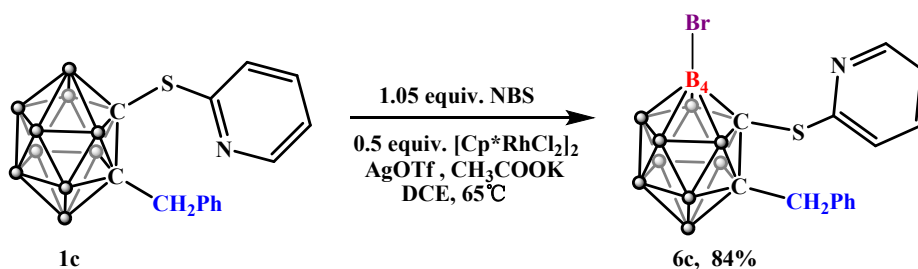

To a solution of ligand **1c** (26.8 mg, 0.1 mmol) in DCE (Dichloroethane) (6 mL), AgOTf (51.4 mg, 0.2 mmol), [Cp\*RhCl<sub>2</sub>]<sub>2</sub> (30.9 mg, 0.05 mmol), NBS (17.8mg, 0.1mmol) and CH<sub>3</sub>COONa (0.1mmol, 9mg) were added and the mixture was stirred for 12h at 65 °C. The obtained suspension was filtered. The filtrate was concentrated under vacuum and purified by column chromatography using silica gel (CH<sub>2</sub>Cl<sub>2</sub>/*n*-hexane= 1: 3). A colorless solution was obtained, and evaporation of the volatiles under vacuum gave the complex **6c** (yield: 35.6 mg, 84%). <sup>1</sup>H NMR (400 MHz; CDCl<sub>3</sub>, ppm): δ = 2.366 (s, H, CH<sub>3</sub>-H), 7.415 (m, 1H, Py-H), 7.801 (m, J = 1.6 Hz, 1H, Py-H), 8.672 (d, J = 5.2 Hz, 1H, Py-H). <sup>13</sup>C{<sup>1</sup>H} NMR (101 MHz; CDCl<sub>3</sub>, ppm): δ = 41.00 (CH<sub>2</sub>-C), 84.02, 86.04 (cage C), 125.73, 133.15, 138.10, 151.02, 152.04 (Py-C), 128.04, 128.66, 130.60, 135.85 (Ph-C). <sup>11</sup>B{<sup>1</sup>H} NMR (160 MHz, CDCl<sub>3</sub>, ppm): δ = -14.33 (1B), -11.84 (2B), -10.34 (2B), -8.81 (2B), -5.63 (1B), -3.84 (1B), -2.98 (1B). ESI-MS: m/z = 424.15 (calcd for [M+H]<sup>+</sup> 424.16).

### Synthesis of *o*-carborane complex **8**

Compound **1b** (26.8mg, 0.10 mmol), [Cp\*RhCl<sub>2</sub>]<sub>2</sub> (30.9 mg, 0.05 mmol), AgOTf (51.4 mg, 0.2 mmol), and CH<sub>3</sub>COOK (0.1mmol, 10mg) were mixed in CH<sub>2</sub>Cl<sub>2</sub> (5 mL). After the reaction mixture was cooled to -78 °C, the reaction tube was evacuated and back-filled with O<sub>2</sub> (3

times, balloon). The reaction tube was then closed after the reaction temperature was warmed to room temperature. The resulting mixture was stirred at 35 °C for 26 h. The obtained suspension was filtered. The filtrate was concentrated under vacuum and purified by column chromatography using silica gel (CH<sub>2</sub>Cl<sub>2</sub>/EA/*n*-hexane= 1:1:3). A white solution was obtained, and evaporation of the volatiles under vacuum gave the complex **8** (yield: 21.0 mg, 74%). <sup>1</sup>H NMR (400 MHz; CDCl<sub>3</sub>, ppm): δ = 2.077 (s, 1H, CH<sub>3</sub>-H), 6.922 (s, 1H, OH-H), 7.420 (ddd, J = 7.2, 3.2, 0.4 Hz, 1H, Py-H), 7.578 (d, J = 7.6 Hz, 1H, Py-H), 7.791 (td, J = 7.6, 2 Hz, 1H, Py-H), 8.653 (dd, J = 4.8, 1.2 Hz, 1H, Py-H). <sup>13</sup>C{<sup>1</sup>H} NMR (101 MHz; CDCl<sub>3</sub>, ppm): δ = 23.40 (CH<sub>3</sub>-C), 76.57, 78.02 (cage C), 125.01, 129.07, 139.10, 150.68, 152.93 (Py-C). <sup>11</sup>B{<sup>1</sup>H} NMR (160 MHz, CDCl<sub>3</sub>, ppm): δ = -19.21 (1B), -13.26 (2B), -11.06 (3B), -17.50 (2B), -6.68 (1B), 5.96 (1B). IR (KBr, disk): ν (B–H) = 2565 cm<sup>-1</sup>. Anal. calcd for complex **8** (C<sub>8</sub>H<sub>17</sub>B<sub>10</sub>SNO): C, 33.80; H, 6.03; N, 4.93. Found: C, 34.23; H, 6.48; N, 4.45. ESI-MS: m/z = 284.21 (calcd for [M+H]<sup>+</sup> 284.21).

### Synthesis of *o*-carborane complex **8d**

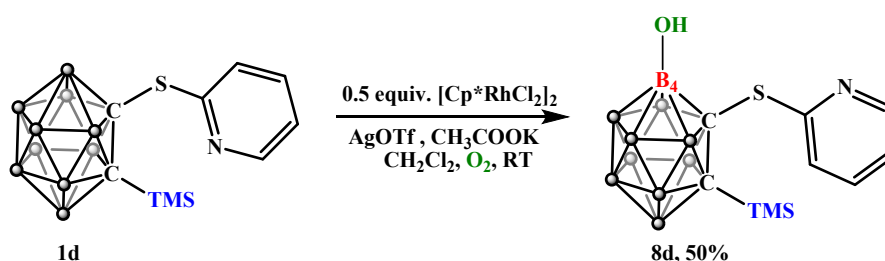

Compound **1d** (26.8mg, 0.10 mmol), [Cp<sup>\*</sup>RhCl<sub>2</sub>]<sub>2</sub> (30.9 mg, 0.05 mmol), AgOTf (51.4 mg, 0.2 mmol), and CH<sub>3</sub>COOK (0.1mmol, 10mg) were mixed in CH<sub>2</sub>Cl<sub>2</sub> (5 mL). After the reaction mixture was cooled to -78 °C, the reaction tube was evacuated and back-filled with O<sub>2</sub> (3 times, balloon). The reaction tube was then closed after the reaction temperature was warmed to room temperature. The resulting mixture was stirred at room temperature for 72 h. The obtained suspension was filtered. The filtrate was concentrated under vacuum and purified by column chromatography using silica gel (CH<sub>2</sub>Cl<sub>2</sub>/EA/*n*-hexane= 1:1:6). A white solution was obtained, and evaporation of the volatiles under vacuum gave the complex **8d** (yield: 17.16 mg, 50%). <sup>1</sup>H NMR (400 MHz; CDCl<sub>3</sub>, ppm): δ = 0.296 (s, 9H, TMS-H), 7.385 (ddd, J = 6, 5.2, 1.2 Hz, 1H, Py-H), 7.433 (d, J = 7.6 Hz, 1H, Py-H), 7.769 (td, J = 8, 2 Hz, 1H, Py-H), 8.624 (dd, J = 4.8, 1.2 Hz, 1H, Py-H). <sup>13</sup>C{<sup>1</sup>H} NMR (101 MHz; CDCl<sub>3</sub>, ppm): δ = 1.16 (TMS-C), 31.37, 38.30 (cage C), 124.43, 127.36, 138.80, 150.27, 153.66 (Py-C). <sup>11</sup>B{<sup>1</sup>H} NMR (160 MHz, CDCl<sub>3</sub>, ppm): δ = -19.91 (1B), -13.97 (1B), -12.77 (1B), -11.68 (1B), -10.86 (1B), -8.96 (1B), -6.99 (1B), -5.61 (1B), -1.82 (1B), 7.07 (1B). Anal. calcd for complex **8d** (C<sub>10</sub>H<sub>23</sub>B<sub>10</sub>SNOSi): C, 35.17; H, 6.79; N, 4.10. Found: C, 34.77; H, 7.45; N, 4.45.

### Synthesis of *o*-carborane complex **9**

Compound **8** (42.6 mg, 0.15 mmol), anhydrous potassium carbonate (52.50 mg, 0.37 mmol) and benzyl bromide (75 μL, 0.60 mmol) were mixed in acetonitrile (5 mL). The resultant mixture was heated at 90 °C for 12 h. After filtration, the filtrate was concentrated to dryness in vacuo. The residue was subjected to column chromatography, giving **9** as colorless oil (46.5 mg, 83%). <sup>1</sup>H NMR (400 MHz; CDCl<sub>3</sub>, ppm): δ = 2.305 (s, 1H, CH<sub>3</sub>-H), 4.852 (d, J = 12.4Hz, 1H, CH<sub>2</sub>-H), 4.958 (d,

1H, CH<sub>2</sub>-H), 7.302 (m, 2H, Ph-H), 7.378 (t, J = 7.2 Hz, 2H, Py-H), 7.445 (s, 1H, Ph-H) 7.463 (s, 1H, Ph-H), 7.653 (m, 2H, Ph-H), 7.578 (dt, J = 5.2, 1.2 Hz, 1H, Py-H). <sup>13</sup>C{<sup>1</sup>H} NMR (101 MHz; CDCl<sub>3</sub>, ppm): δ = 23.25 (CH<sub>3</sub>-C), 31.64, 80.11 (cage C), 72.38 (CH<sub>2</sub>-C), 125.18, 128.45, 137.76, 150.71, 152.39 (Py-C), 127.31, 127.61, 132.96, 139.50 (Ph-C). <sup>11</sup>B{<sup>1</sup>H} NMR (160 MHz, CDCl<sub>3</sub>, ppm): δ = -18.57 (1B), -13.55 (1B), -12.68 (3B), -10.92 (2B), -7.32 (1B), -5.88 (1B), 6.72 (1B).

## NMR spectra:

Figure S1.  $^1\text{H}$  NMR (400 MHz,  $\text{CDCl}_3$ , ppm) of **1b**.

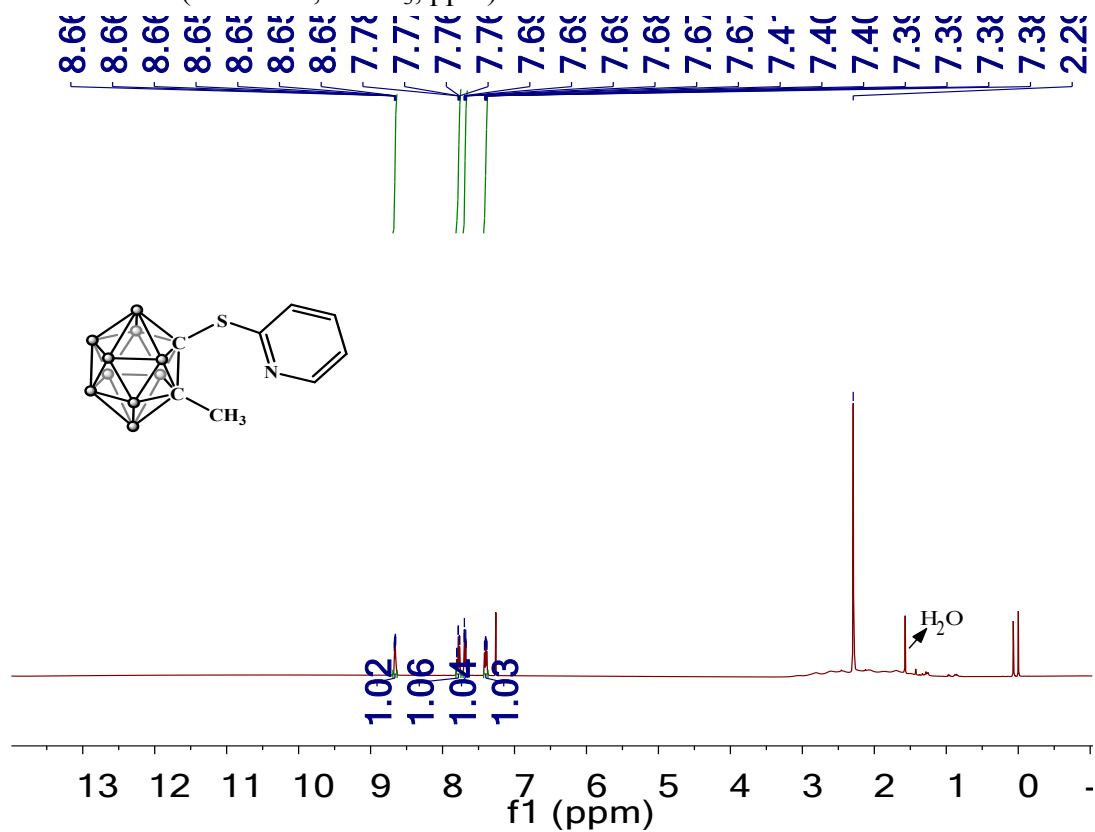

Figure S2.  $^{13}\text{C}$   $\{^1\text{H}\}$  NMR (101 MHz,  $\text{CDCl}_3$ , ppm) of **1b**.

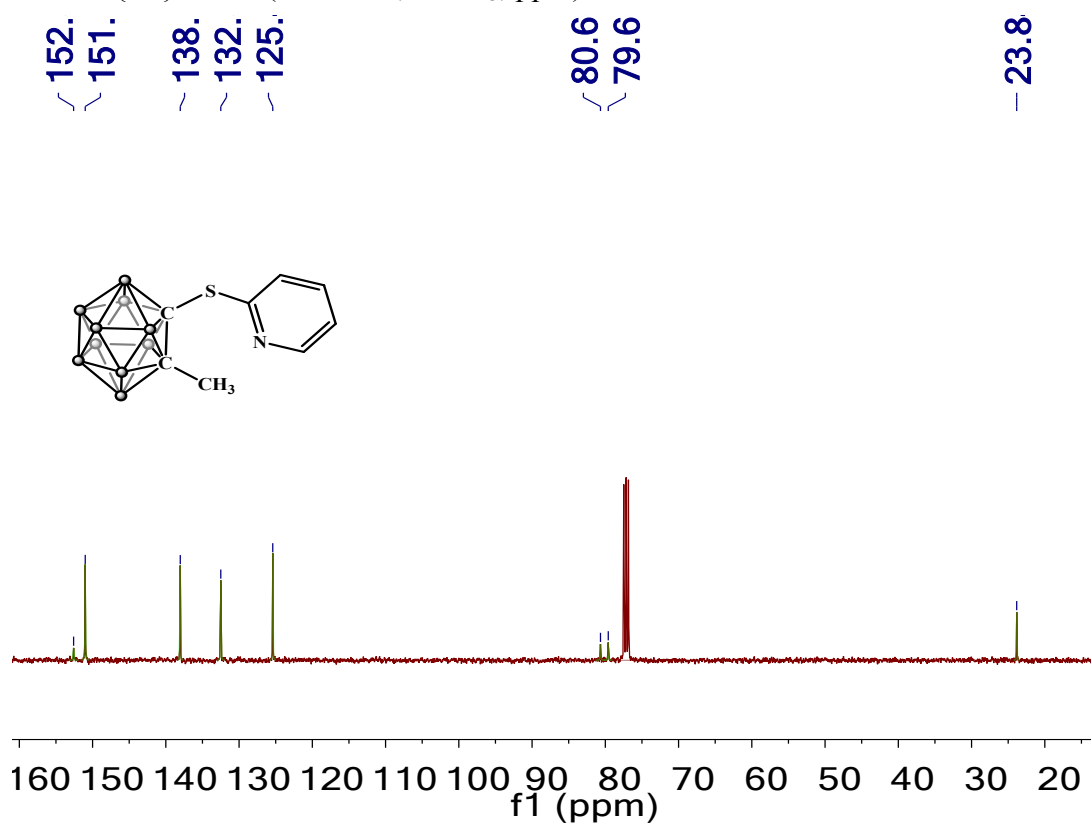

**Figure S3.**  $^{11}\text{B}$   $\{^1\text{H}\}$  NMR (101 MHz,  $\text{CDCl}_3$ , ppm) of **1b**.

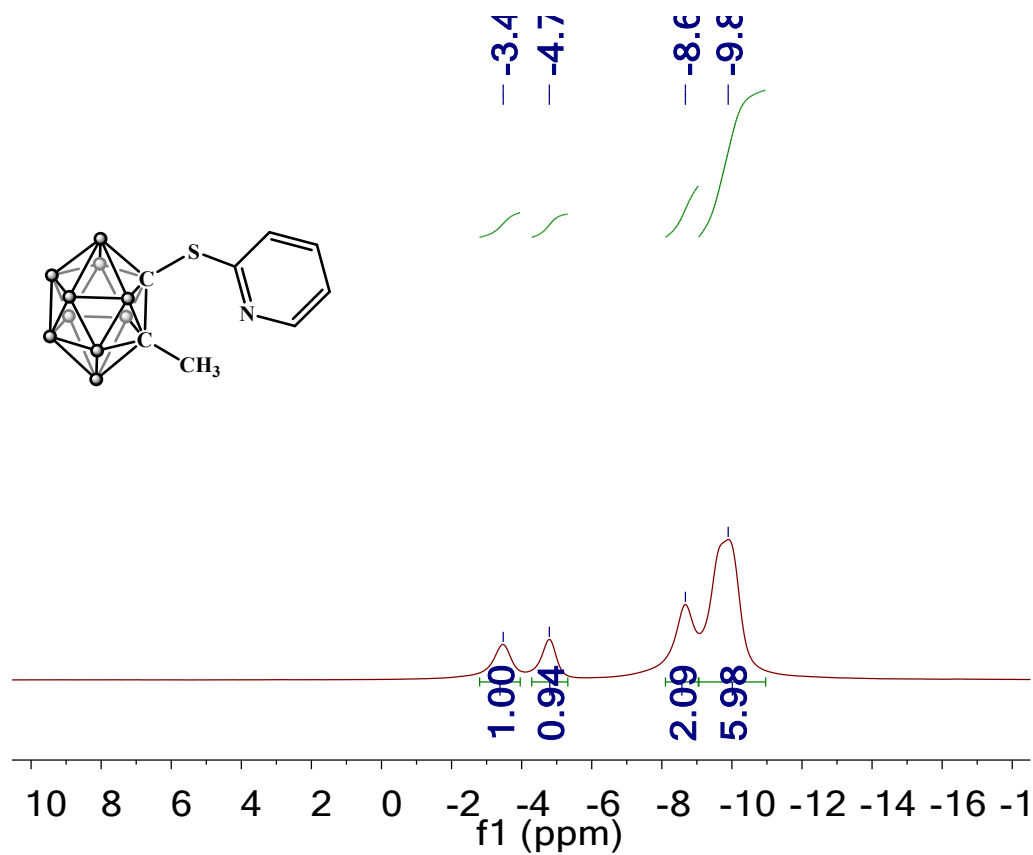

**Figure S4.**  $^1\text{H}$  NMR (400 MHz,  $\text{CDCl}_3$ , ppm) of **1c**.

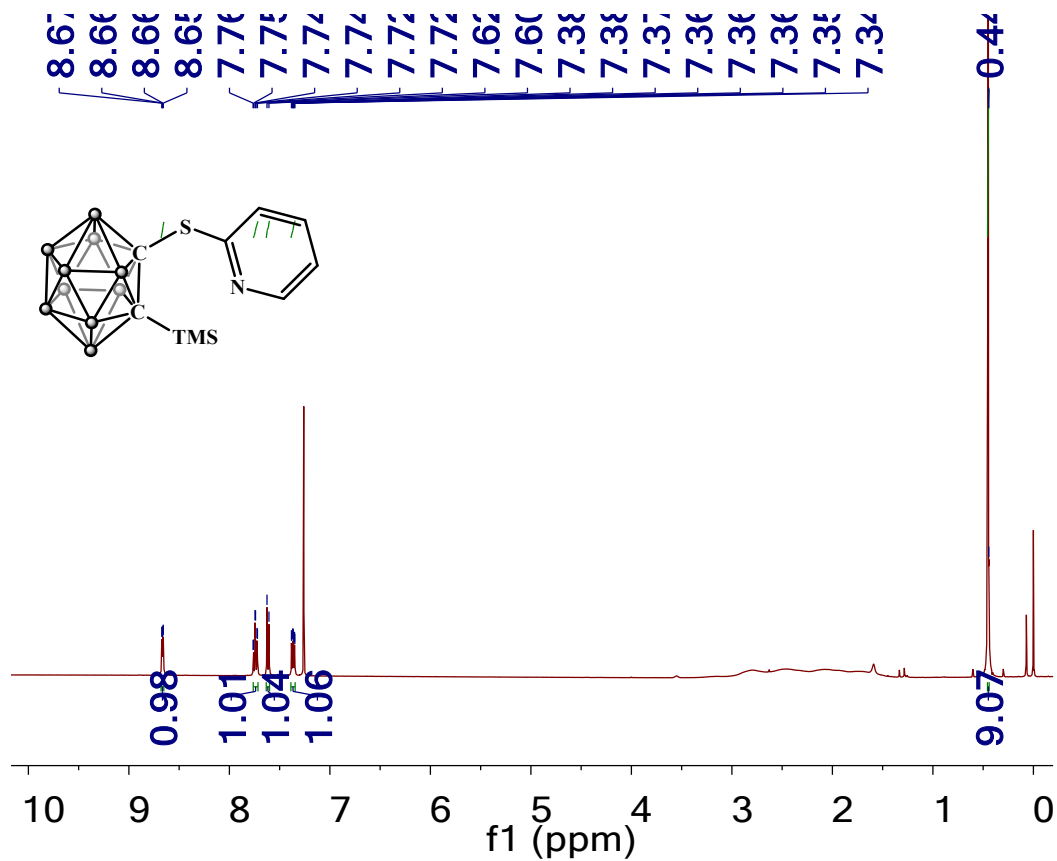

**Figure S5.**  $^{13}\text{C}$   $\{^1\text{H}\}$  NMR (101 MHz,  $\text{CDCl}_3$ , ppm) of **1c**.

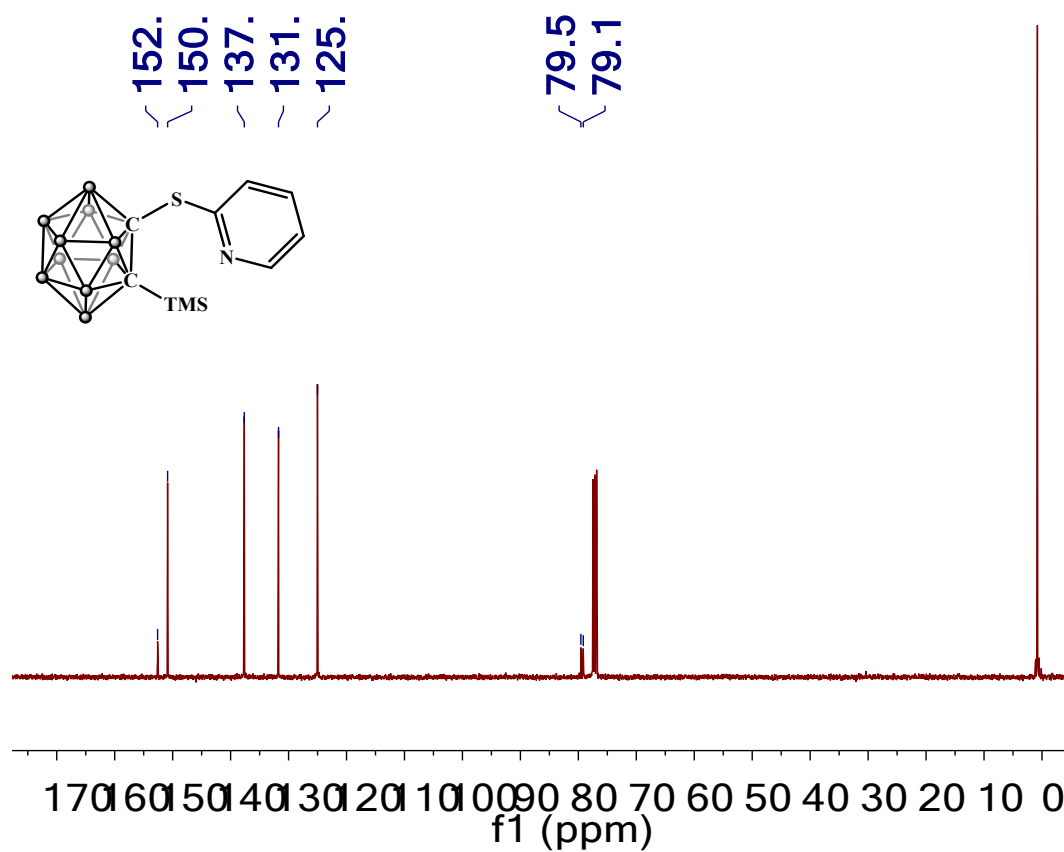

**Figure S6.**  $^{11}\text{B}$   $\{^1\text{H}\}$  NMR (101 MHz,  $\text{CDCl}_3$ , ppm) of **1c**.

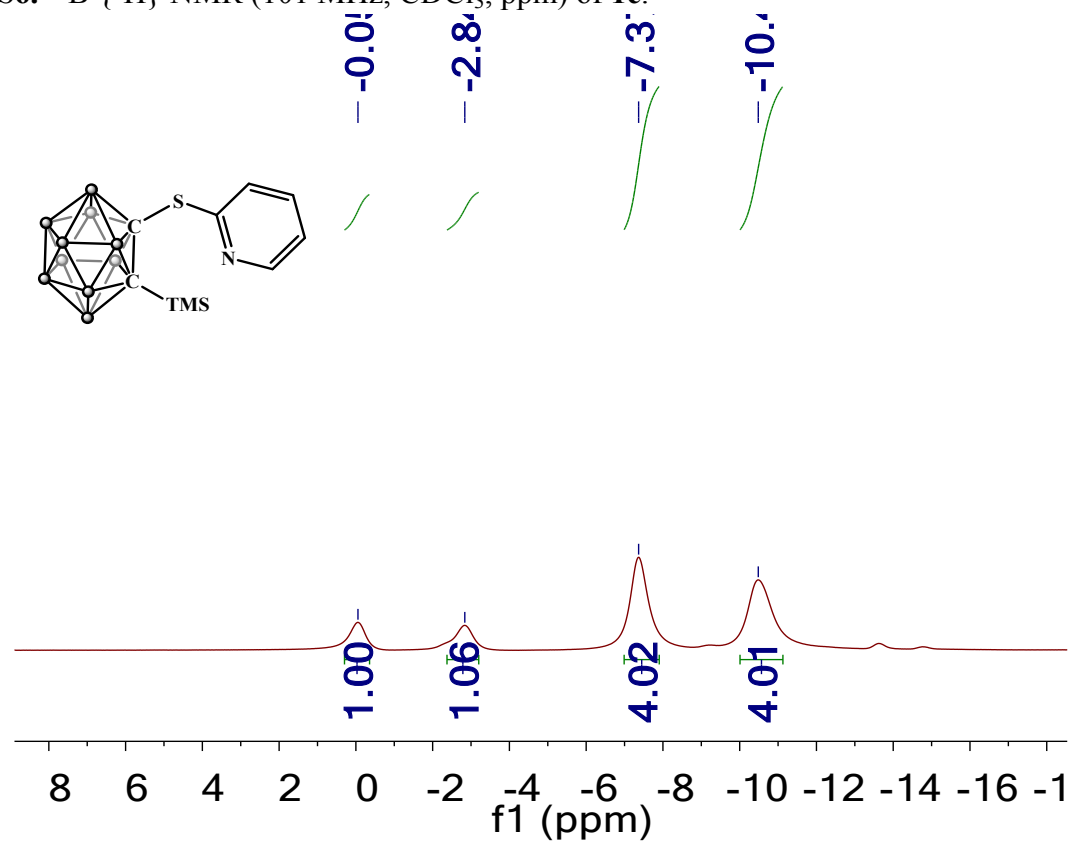

Figure S7.  $^1\text{H}$  NMR (400 MHz,  $\text{CDCl}_3$ , ppm) of **1d**.

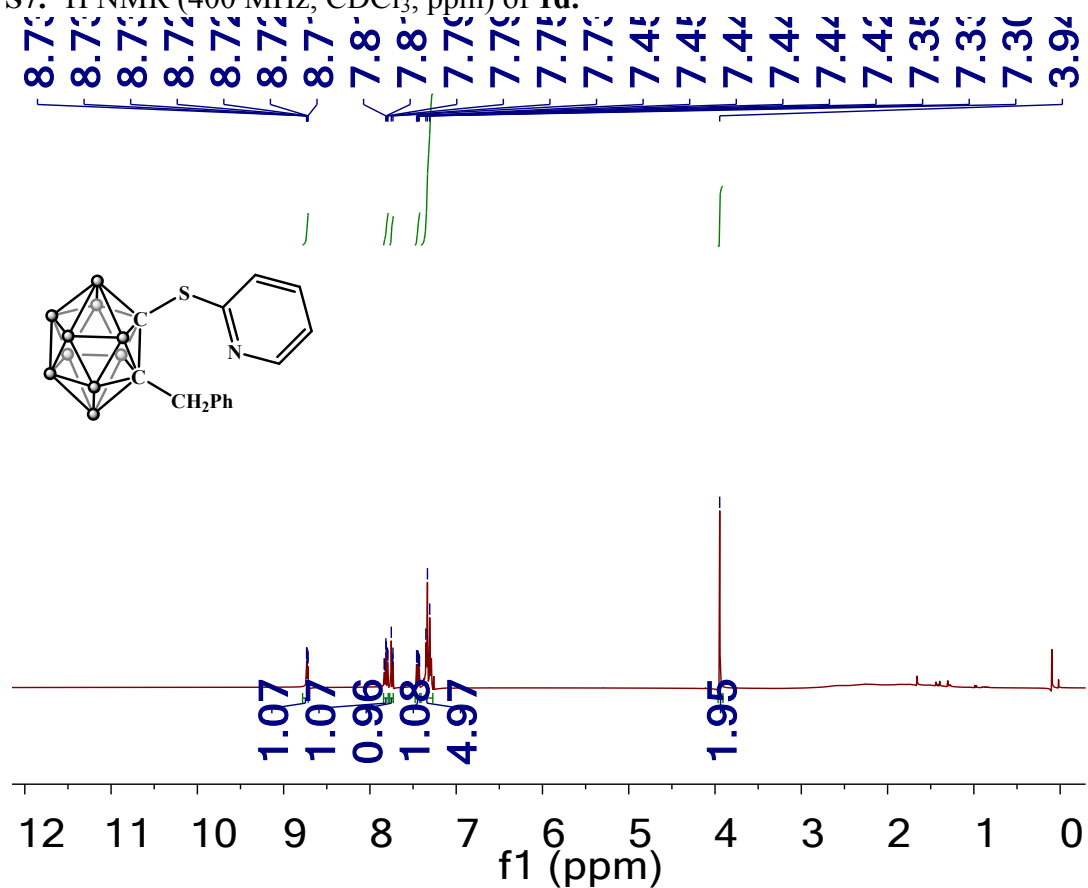

Figure S8.  $^{13}\text{C}$   $\{^1\text{H}\}$  NMR (101 MHz,  $\text{CDCl}_3$ , ppm) of **1d**.

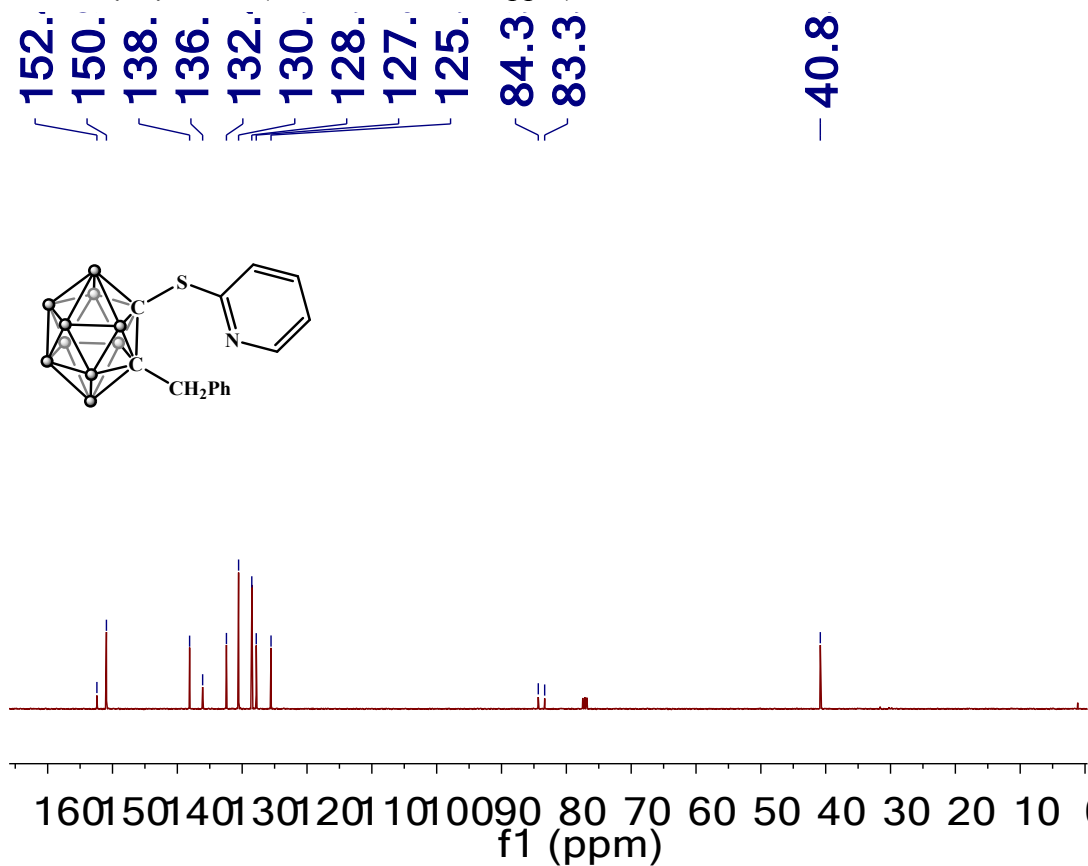

**Figure S9.**  $^{11}\text{B}$   $\{^1\text{H}\}$  NMR (101 MHz,  $\text{CDCl}_3$ , ppm) of **1d**.

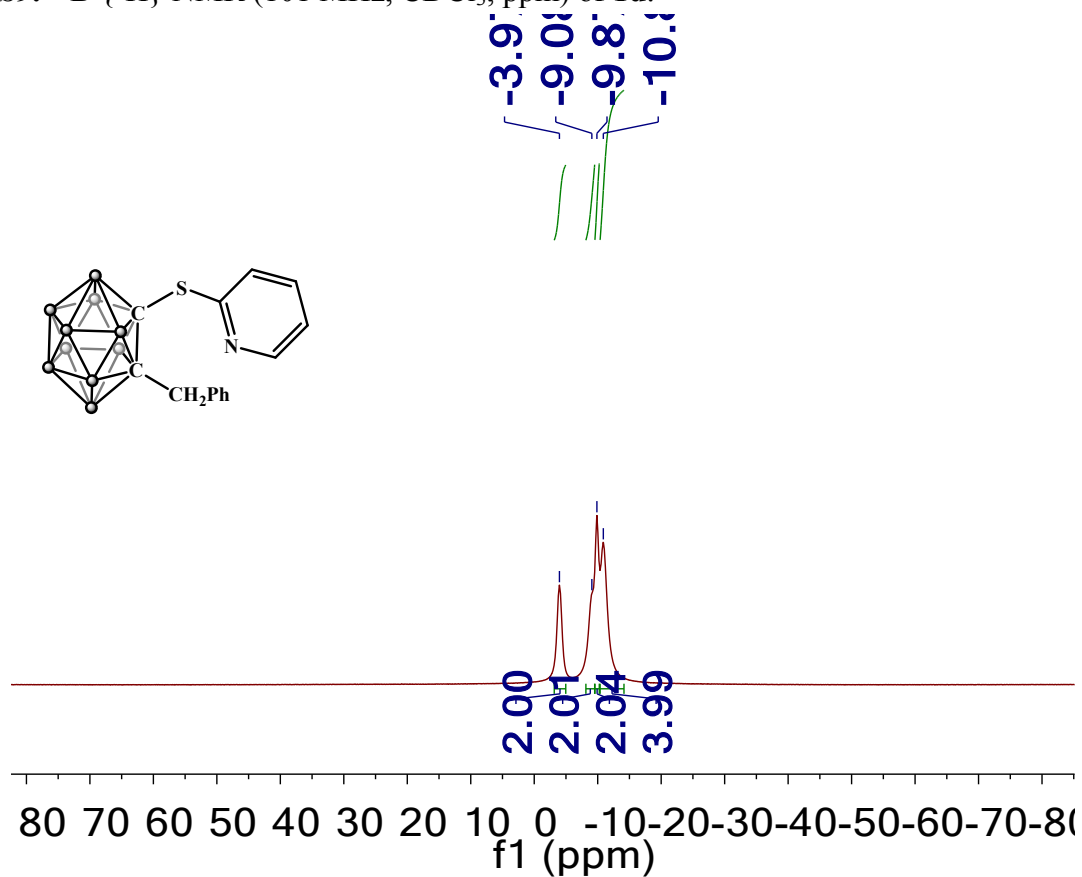

**Figure S10.**  $^1\text{H}$  NMR (400 MHz,  $\text{CDCl}_3$ , ppm) of **2**.

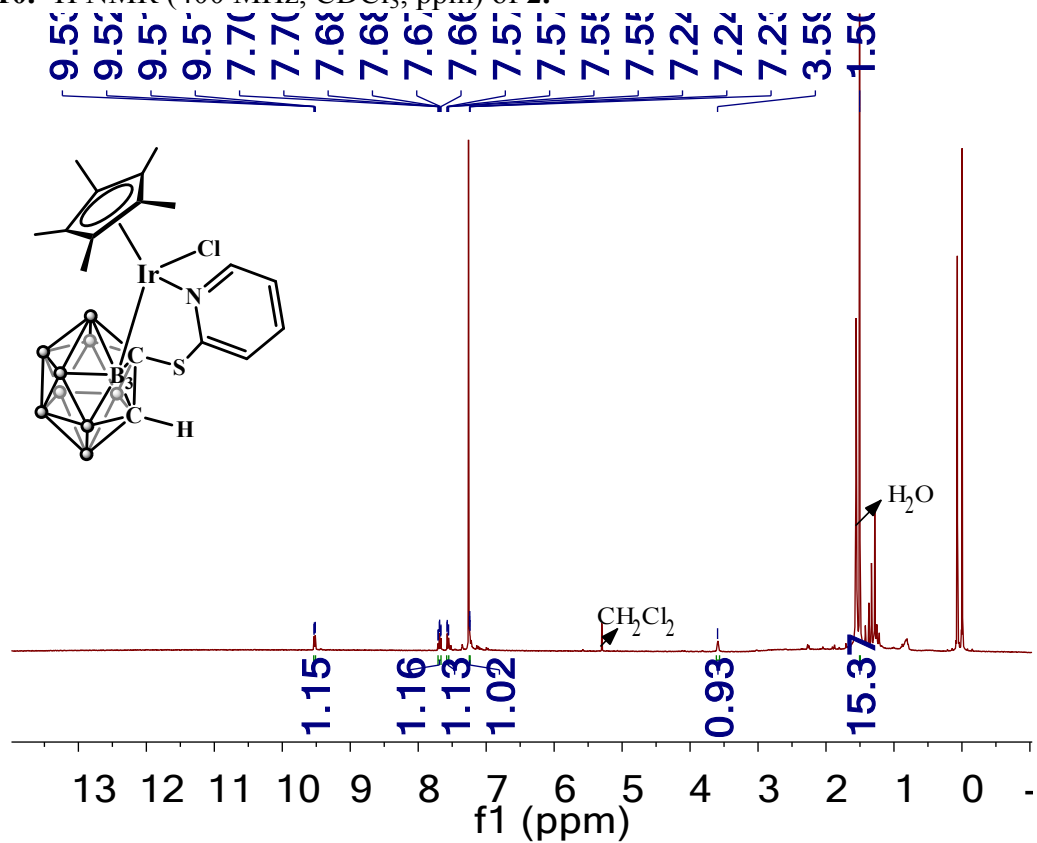

**Figure S11.**  $^{13}\text{C}$  { $^1\text{H}$ } NMR (101 MHz,  $\text{CDCl}_3$ , ppm) of **2**.

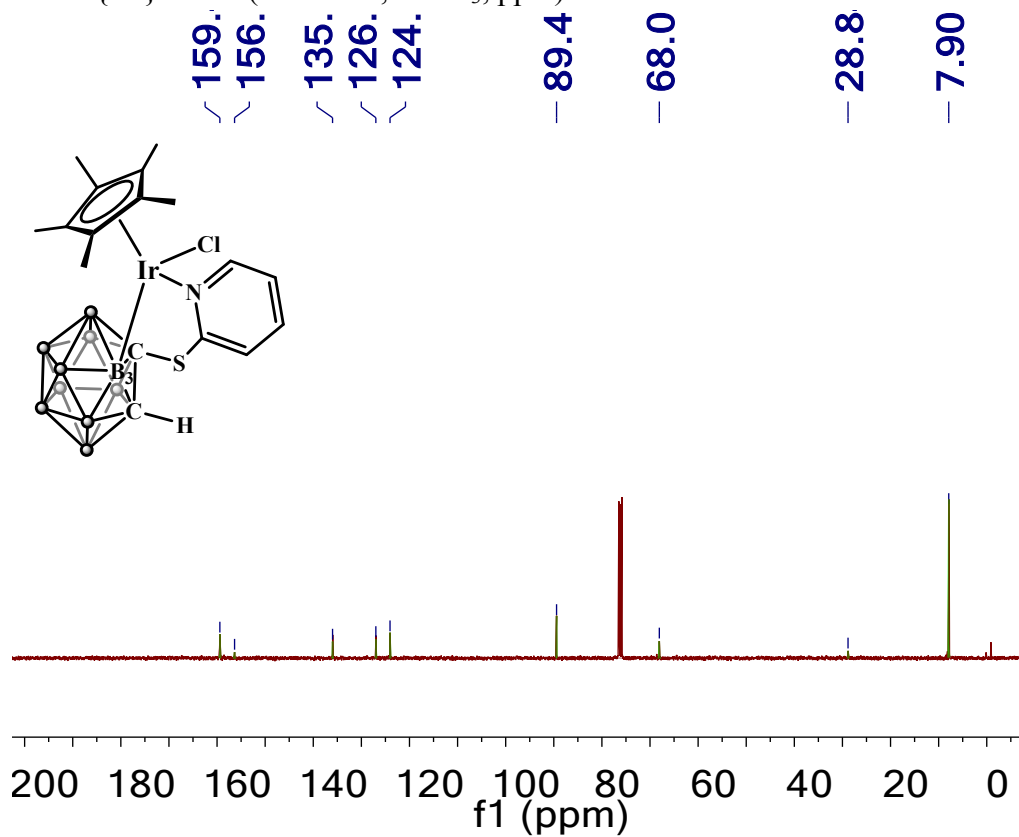

**Figure S12.**  $^{11}\text{B}$  { $^1\text{H}$ } NMR (101 MHz,  $\text{CDCl}_3$ , ppm) of **2**.

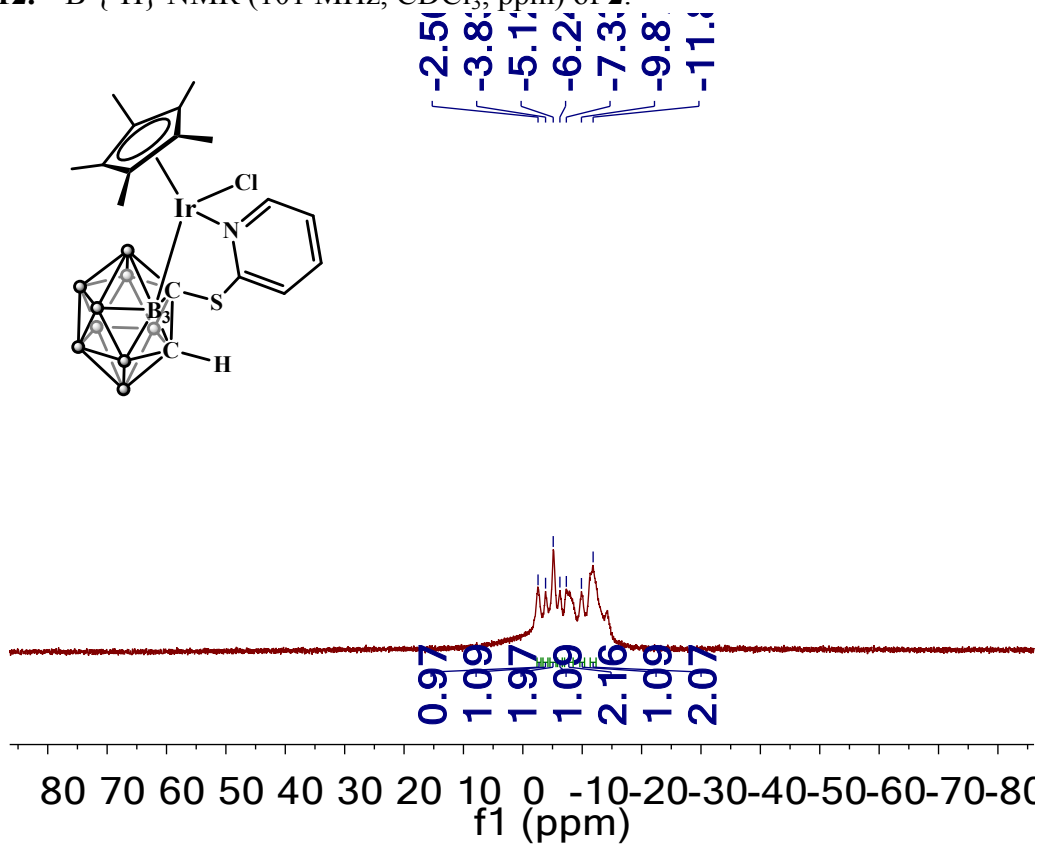

**Figure S13.**  $^1\text{H}$  NMR (400 MHz,  $\text{CDCl}_3$ , ppm) of **3**.



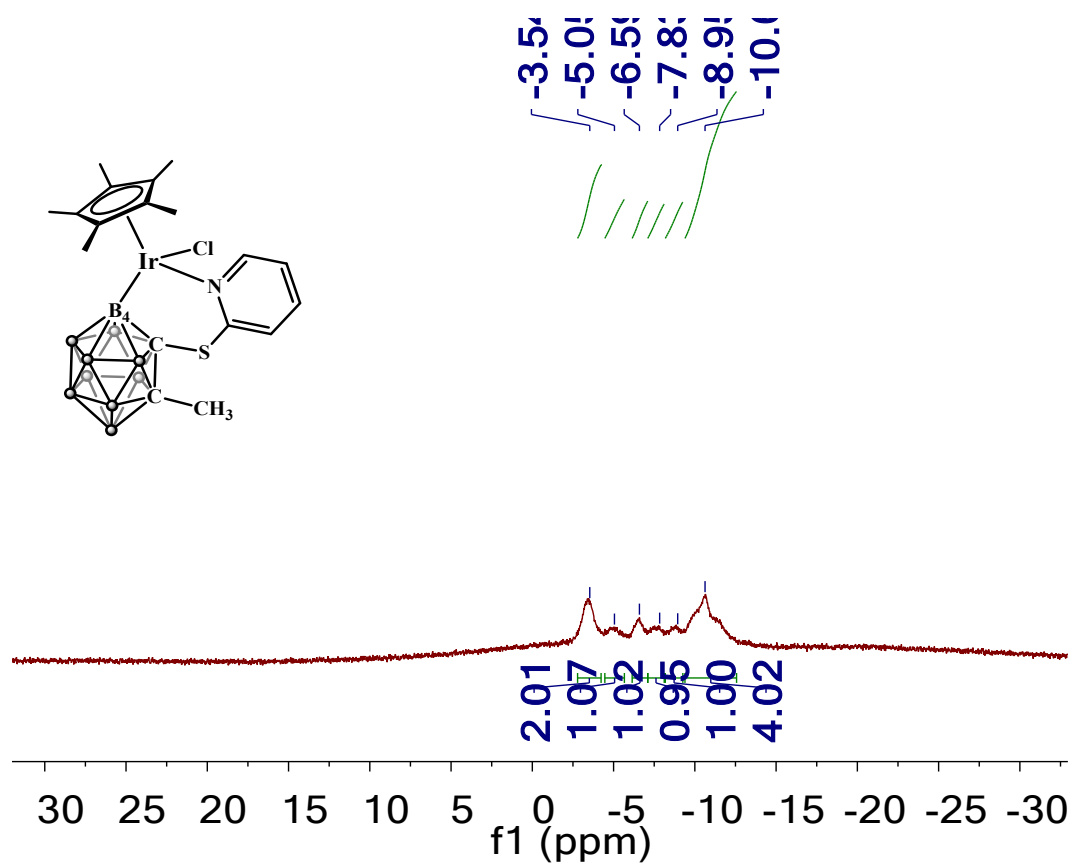

Figure S16. <sup>1</sup>H NMR (400 MHz, CDCl<sub>3</sub>, ppm) of 4.

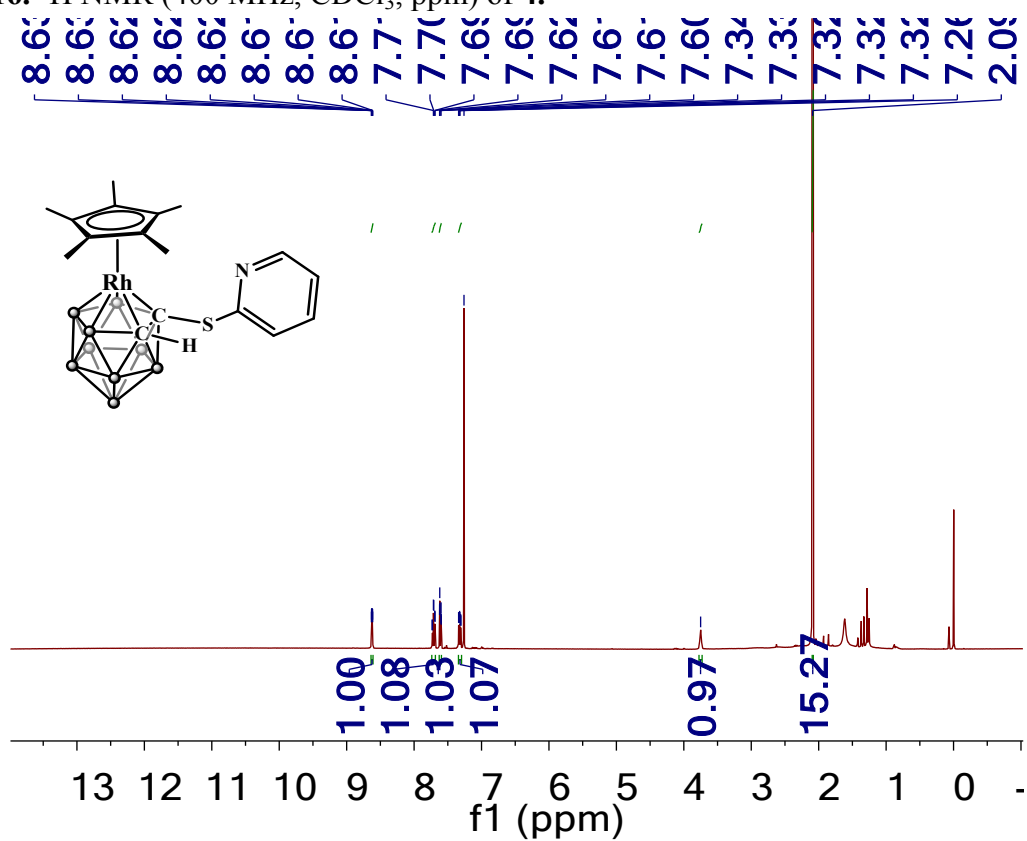

Figure S17. <sup>13</sup>C {<sup>1</sup>H} NMR (101 MHz, CDCl<sub>3</sub>, ppm) of 4.

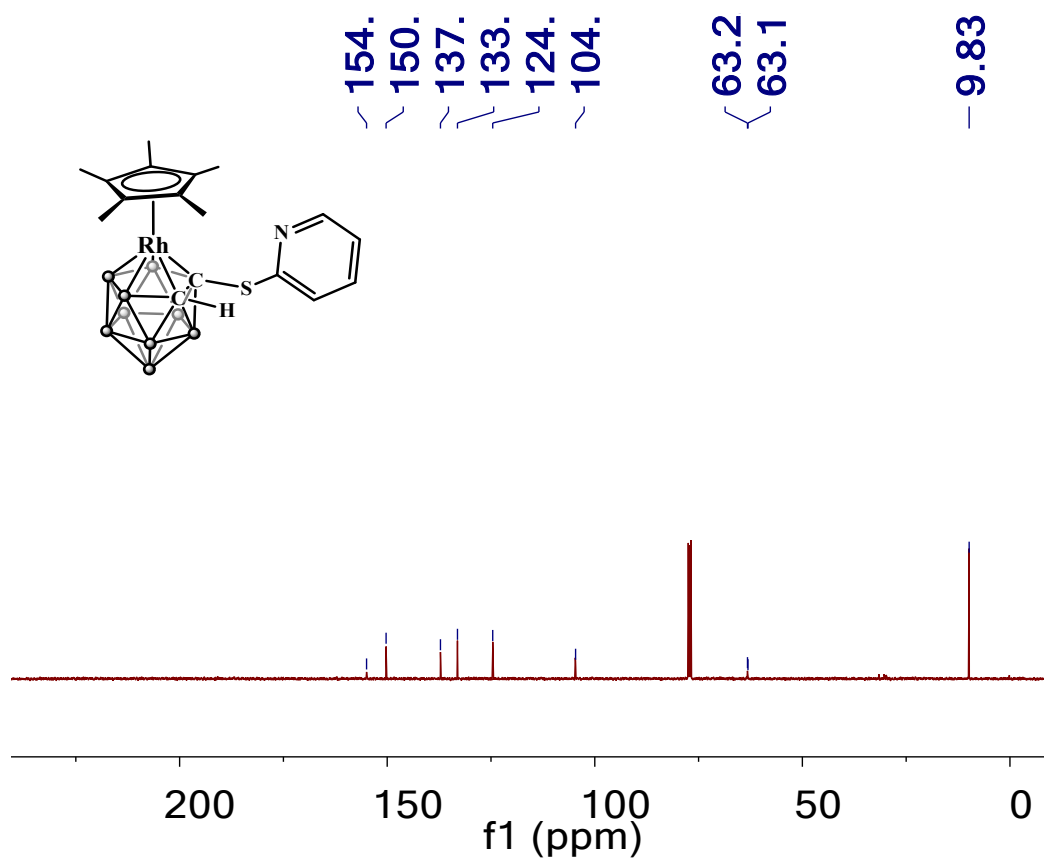

**Figure S18.**  $^{11}\text{B}$   $\{^1\text{H}\}$  NMR (101 MHz,  $\text{CDCl}_3$ , ppm) of 4.

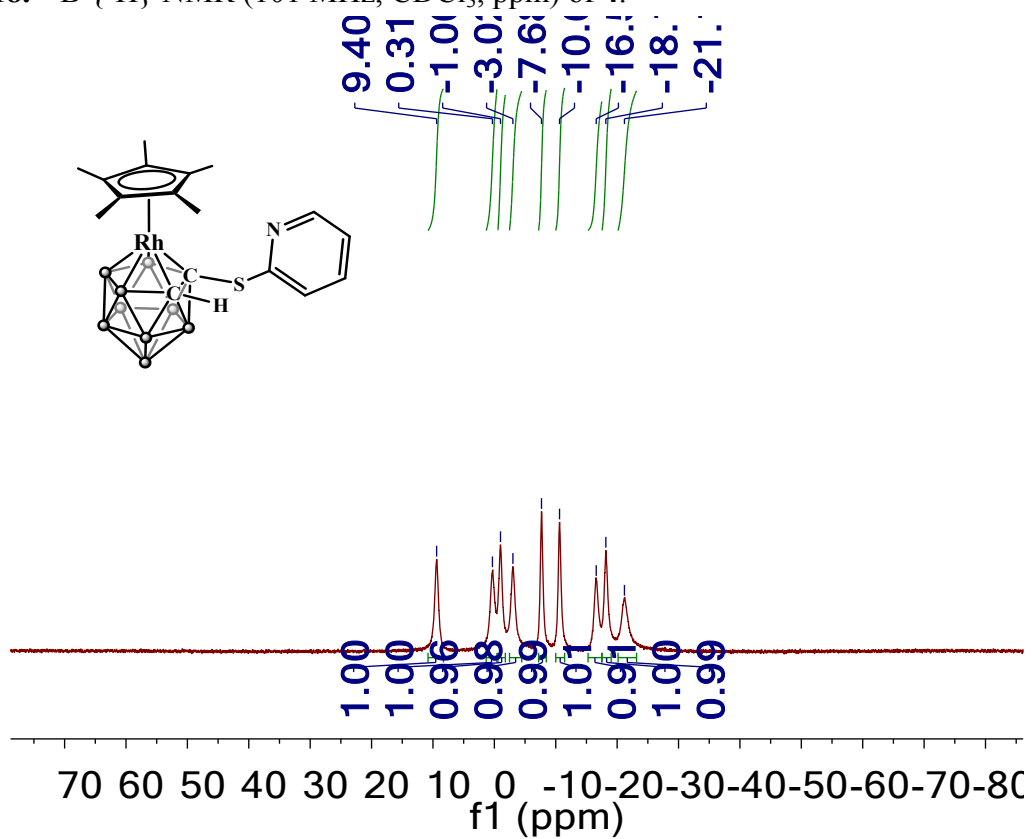

Figure S19.  $^1\text{H}$  NMR (400 MHz,  $\text{CDCl}_3$ , ppm) of **5**.

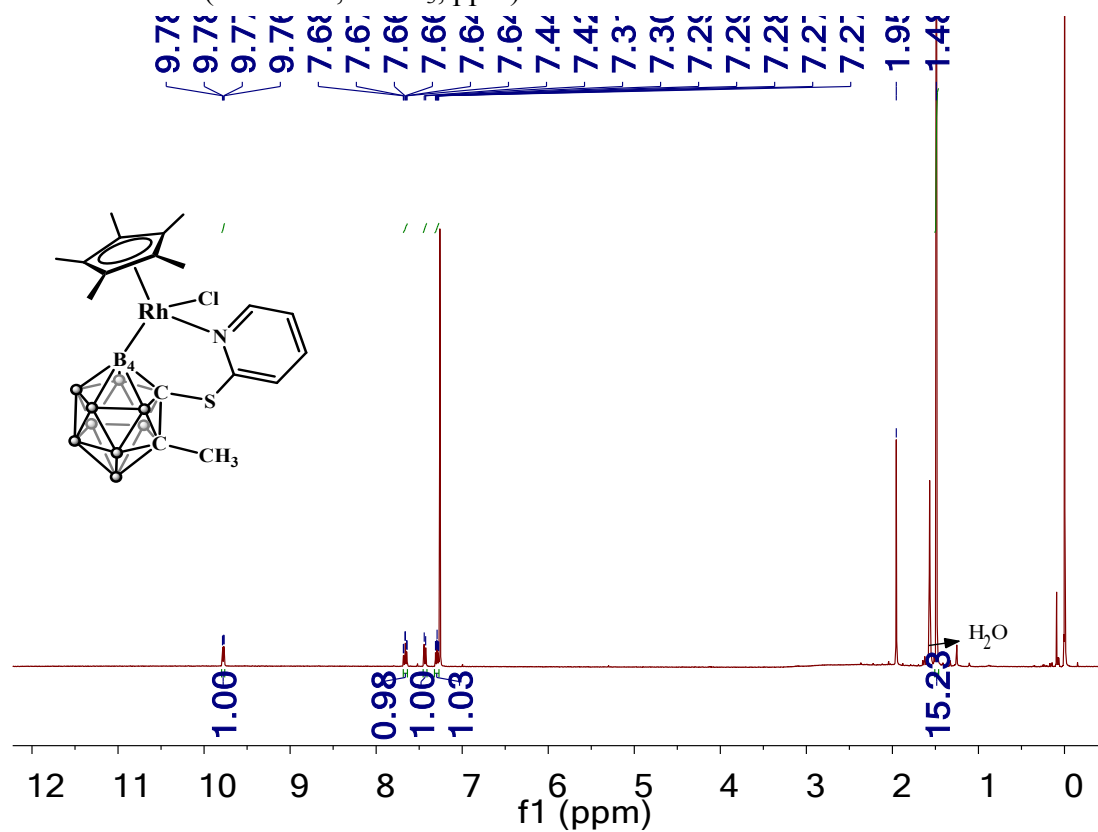

Figure S20.  $^{13}\text{C}$  { $^1\text{H}$ } NMR (101 MHz,  $\text{CDCl}_3$ , ppm) of **5**.

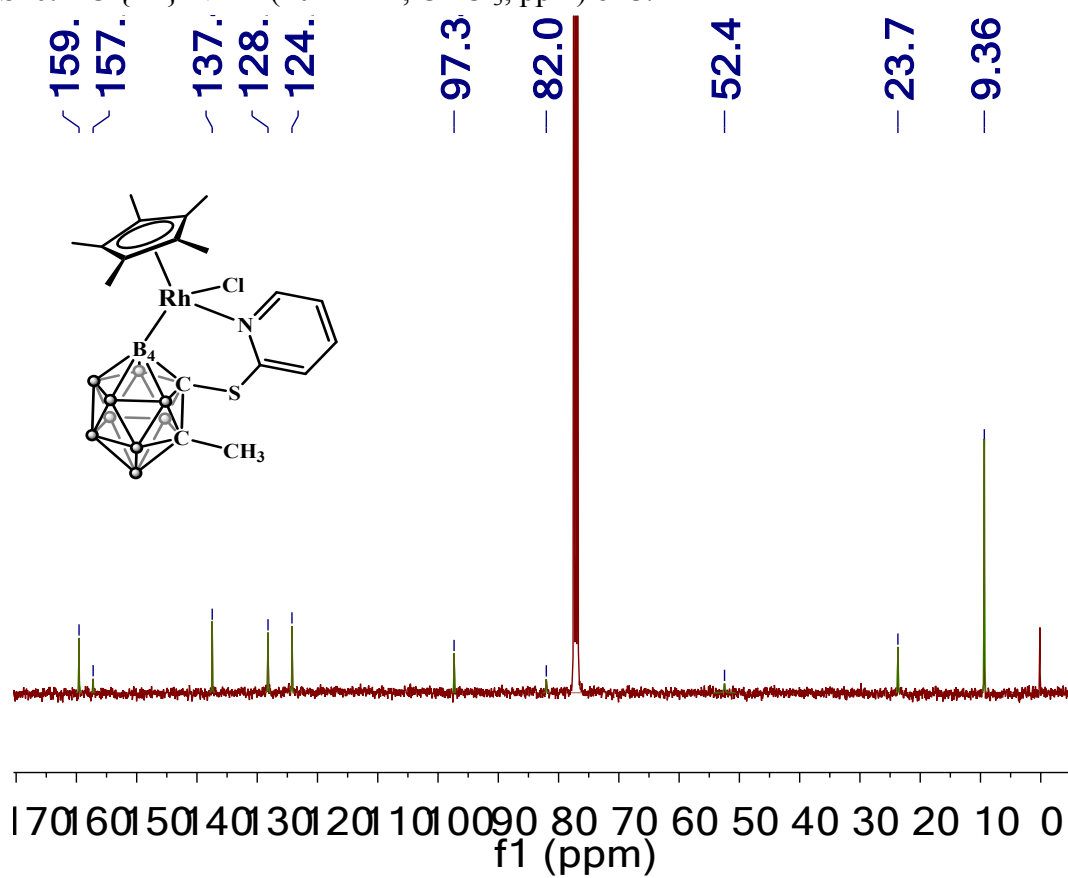

**Figure S21.**  $^{11}\text{B}$   $\{^1\text{H}\}$  NMR (101 MHz,  $\text{CDCl}_3$ , ppm) of **5**.

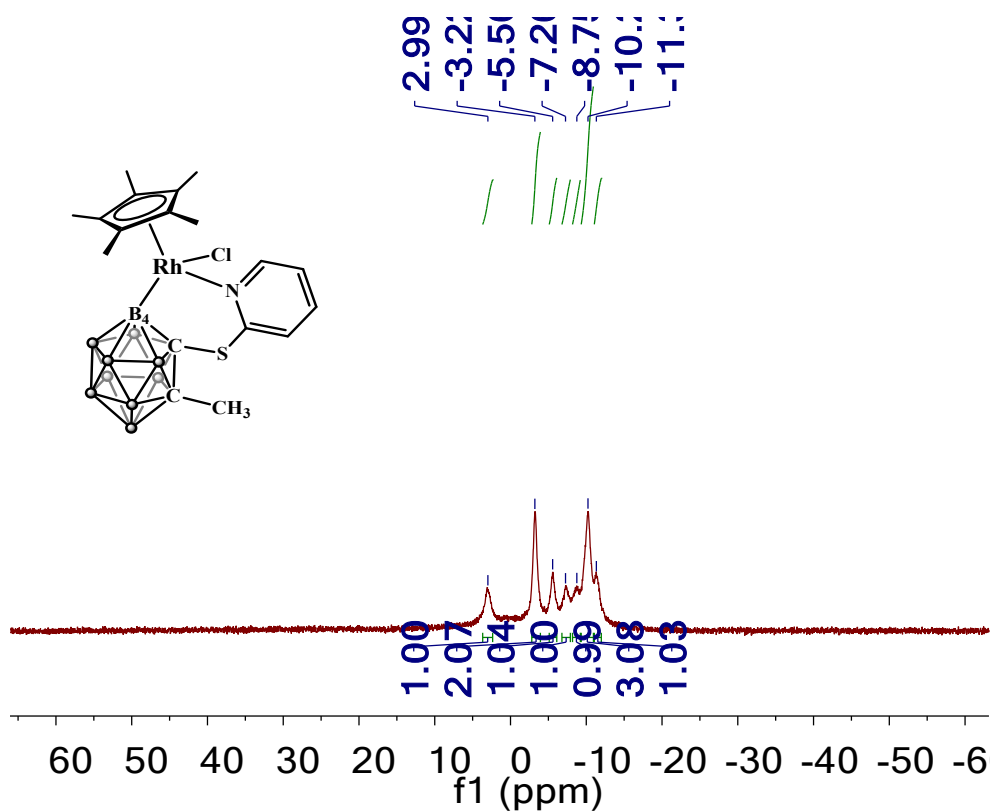

**Figure S22.**  $^1\text{H}$  NMR (400 MHz,  $\text{CDCl}_3$ , ppm) of **6**.

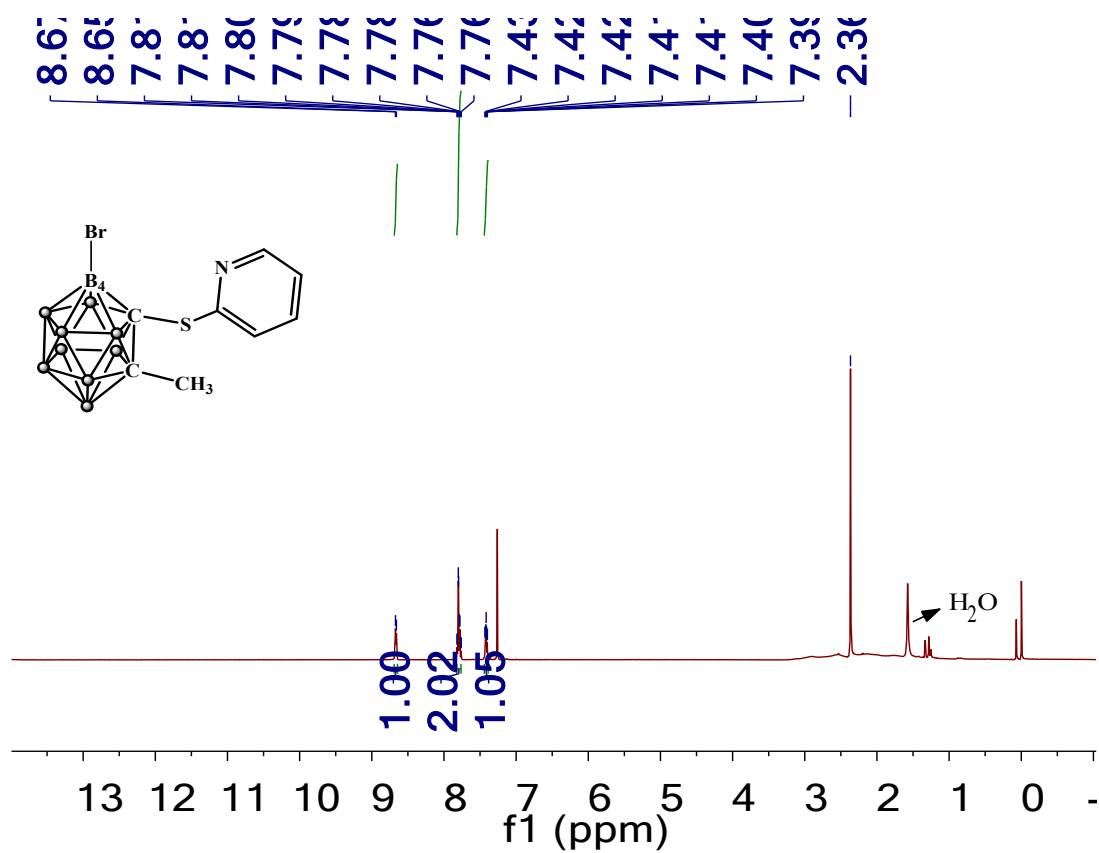

**Figure S23.**  $^{13}\text{C}$   $\{^1\text{H}\}$  NMR (101 MHz,  $\text{CDCl}_3$ , ppm) of **6**.

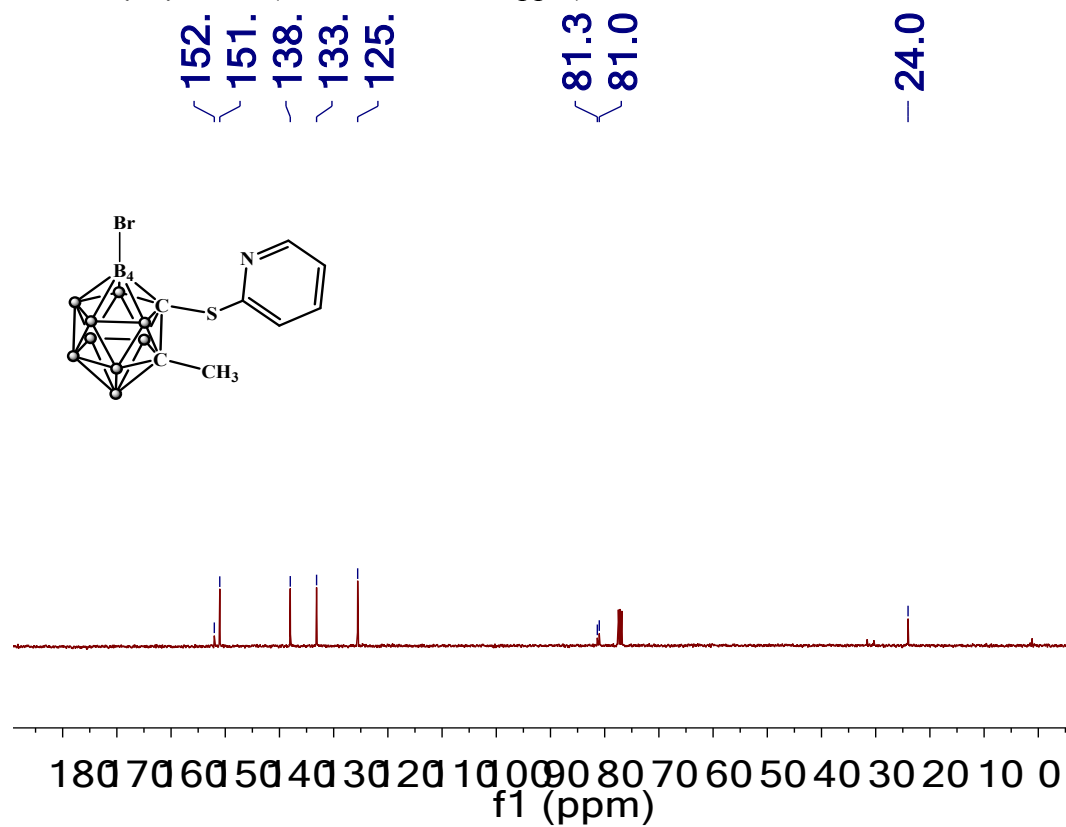

**Figure S24.**  $^{11}\text{B}$   $\{^1\text{H}\}$  NMR (101 MHz,  $\text{CDCl}_3$ , ppm) of **6**.

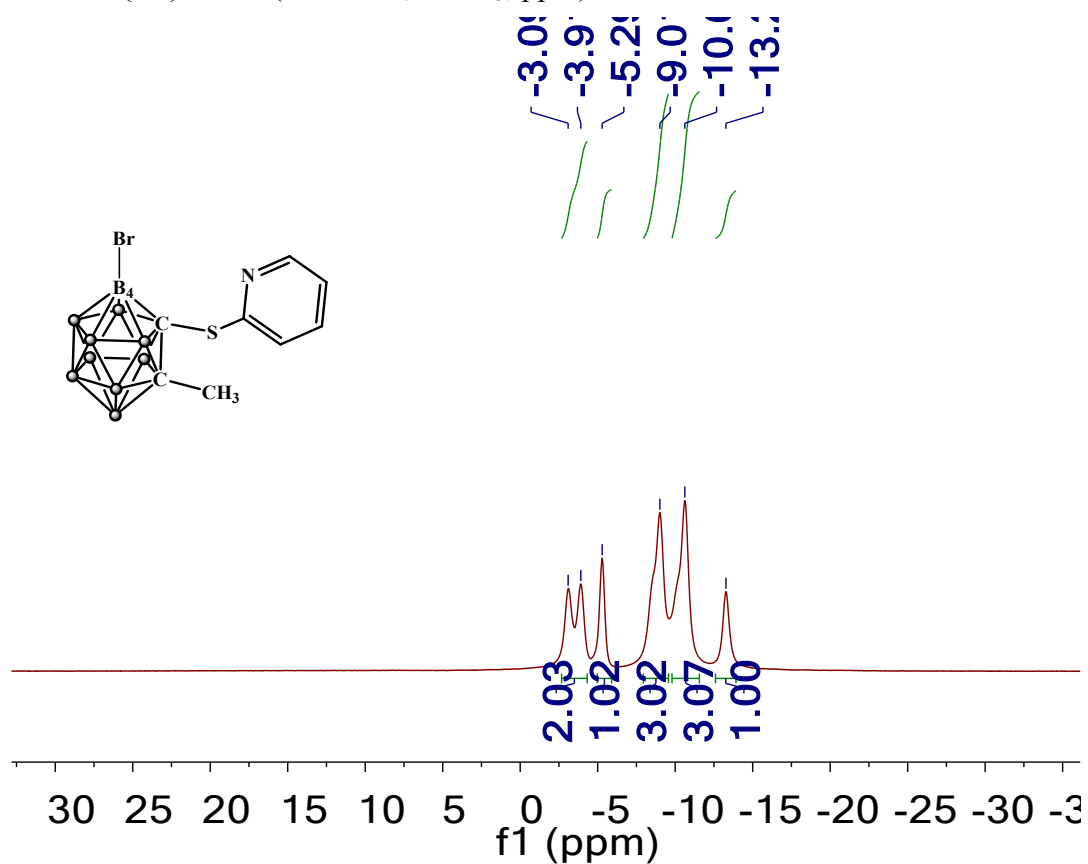

Chemical structure of compound **1** is shown in the top left corner. The structure is a 1,2-bis(4-pyridyl)ethane derivative. The <sup>1</sup>H NMR spectrum (CDCl<sub>3</sub>) shows peaks from 0 to 10 ppm. The aromatic protons appear as a multiplet between 7.3 and 8.7 ppm. A singlet at ~2.3 ppm is assigned to the methyl group. A broad peak at ~1.5 ppm is assigned to water (H<sub>2</sub>O). Integration values are shown below the baseline: 1.01, 2.13, and 1.05.

Chemical structure: 1-iodo-2-methyl-2-(pyren-2-ylthio)ethane

<sup>13</sup>C NMR peaks (ppm): 152.1, 151.1, 138.1, 133.1, 125.1, 81.3, 80.7, 24.3

Figure S27.  $^{11}\text{B}$   $\{^1\text{H}\}$  NMR (101 MHz,  $\text{CDCl}_3$ , ppm) of **7**.

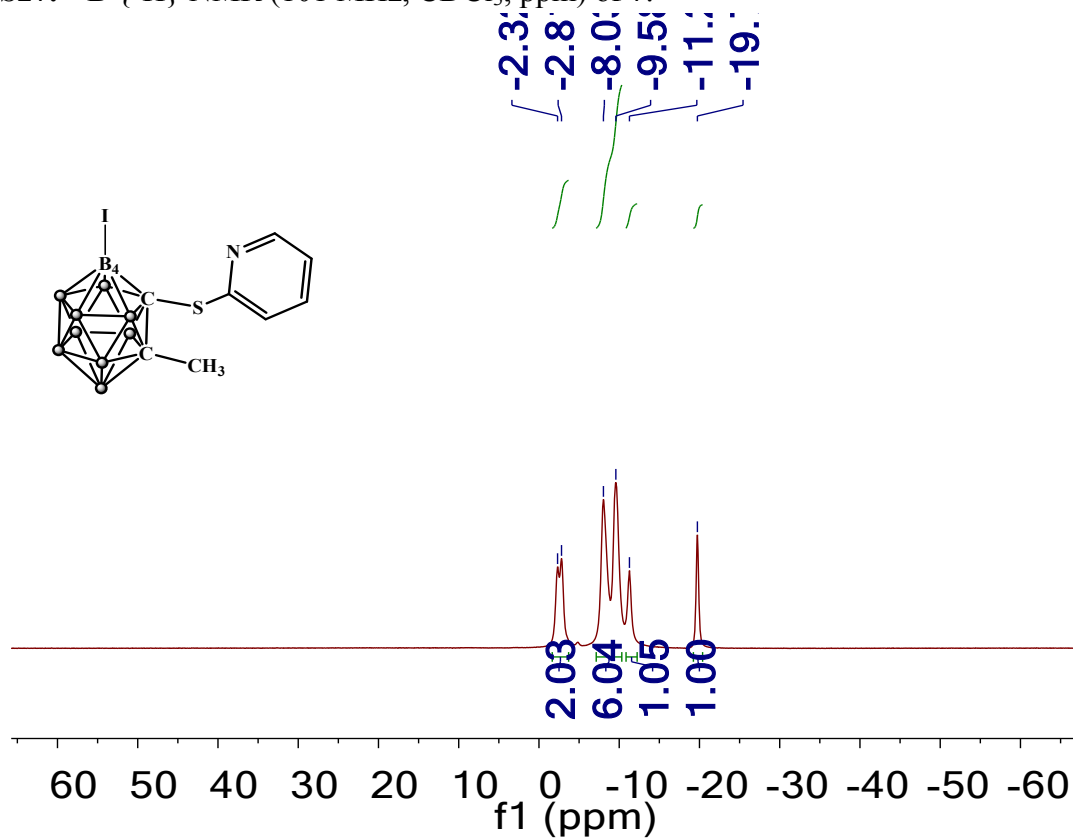

Figure S28.  $^1\text{H}$  NMR (400 MHz,  $\text{CDCl}_3$ , ppm) of **6c**.

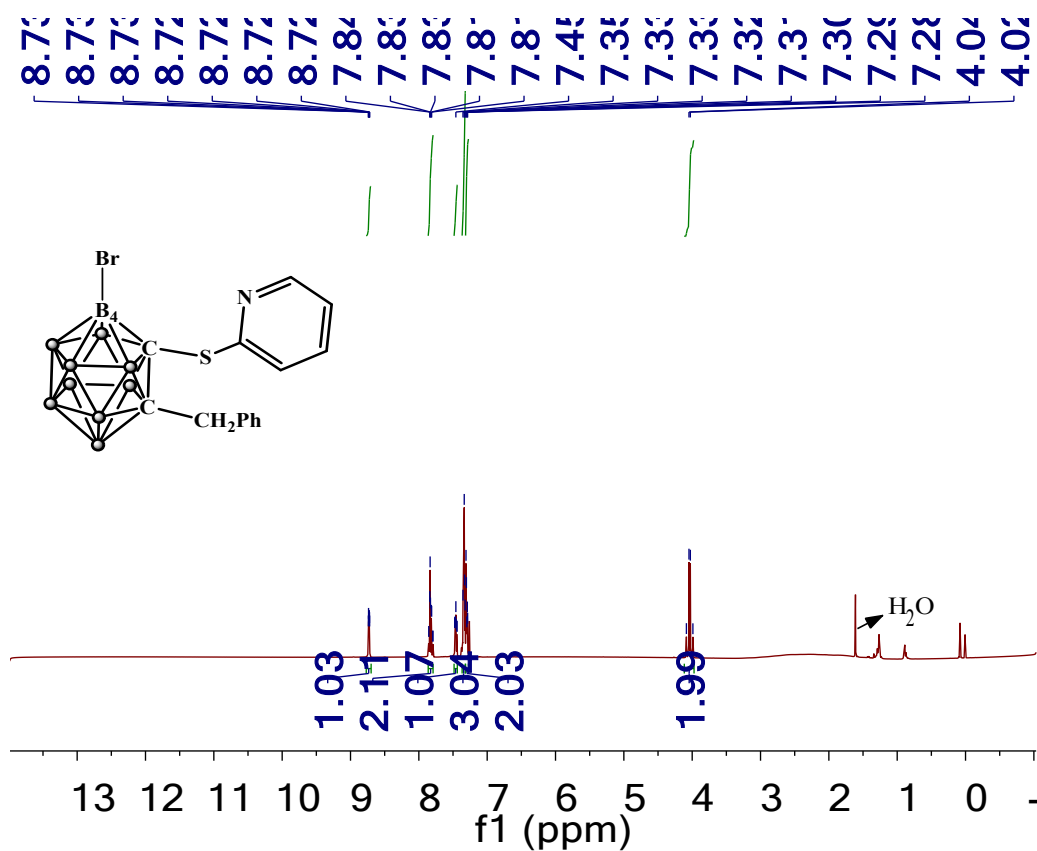

152.  
151.  
138.  
135.  
133.  
130.  
128.  
128.  
125.  
86.0  
84.0  
- 41.0

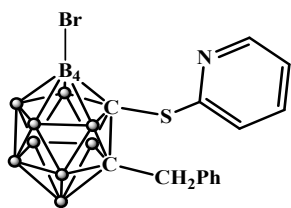

| Group         | Very satisfied (%) |
|---------------|--------------------|
| All Americans | 2.9                |
| Whites        | 3.8                |
| Blacks        | 5.6                |
| Asians        | 8.8                |
| Hispanics     | 10.2               |
| 18-29         | 11.4               |

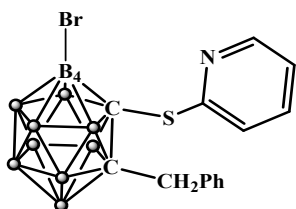

S23

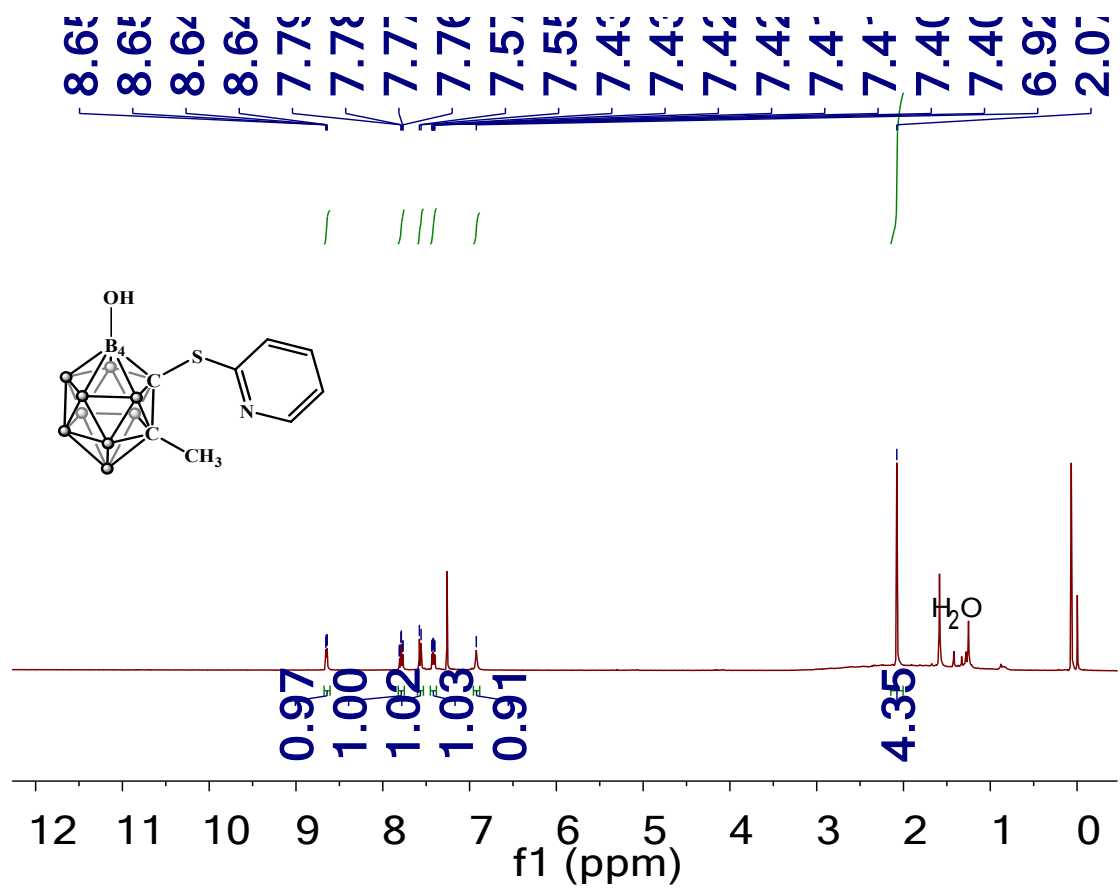

**Figure S32.**  $^{13}\text{C}$   $\{^1\text{H}\}$  NMR (101 MHz,  $\text{CDCl}_3$ , ppm) of 8.

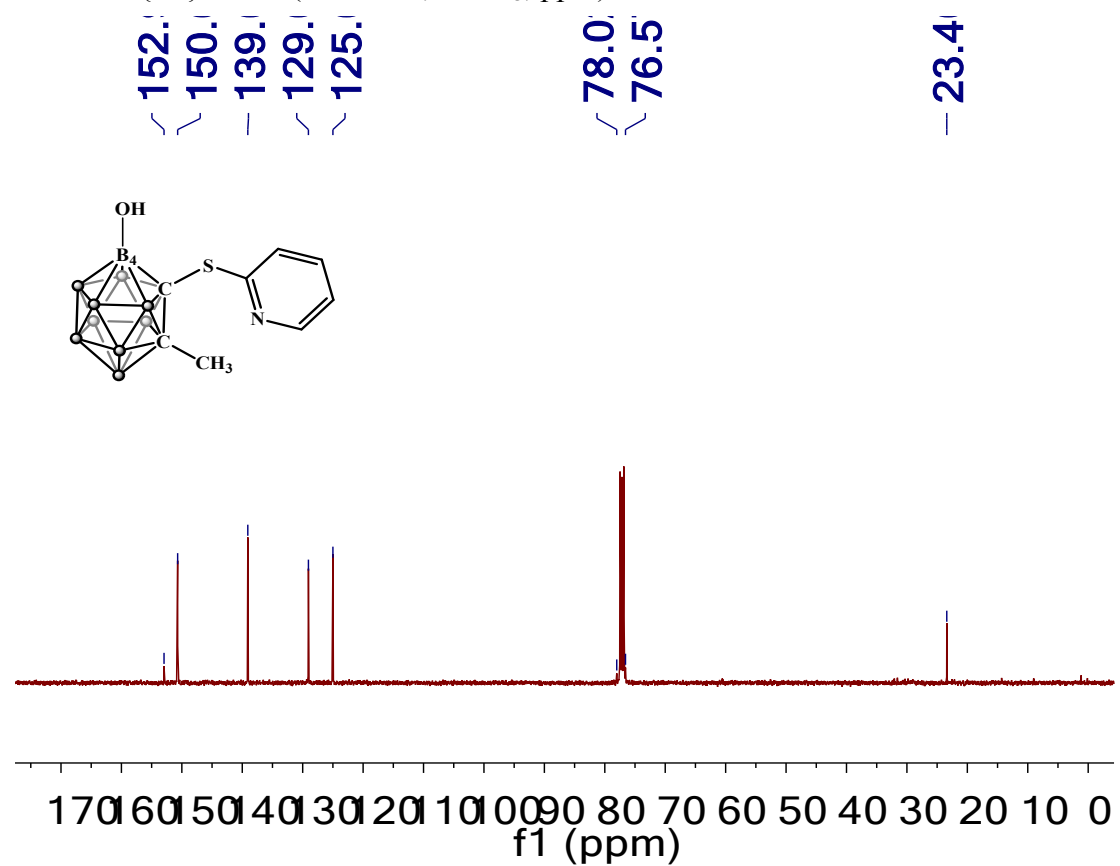

**Figure S33.**  $^{11}\text{B}$   $\{^1\text{H}\}$  NMR (101 MHz,  $\text{CDCl}_3$ , ppm) of **8**.

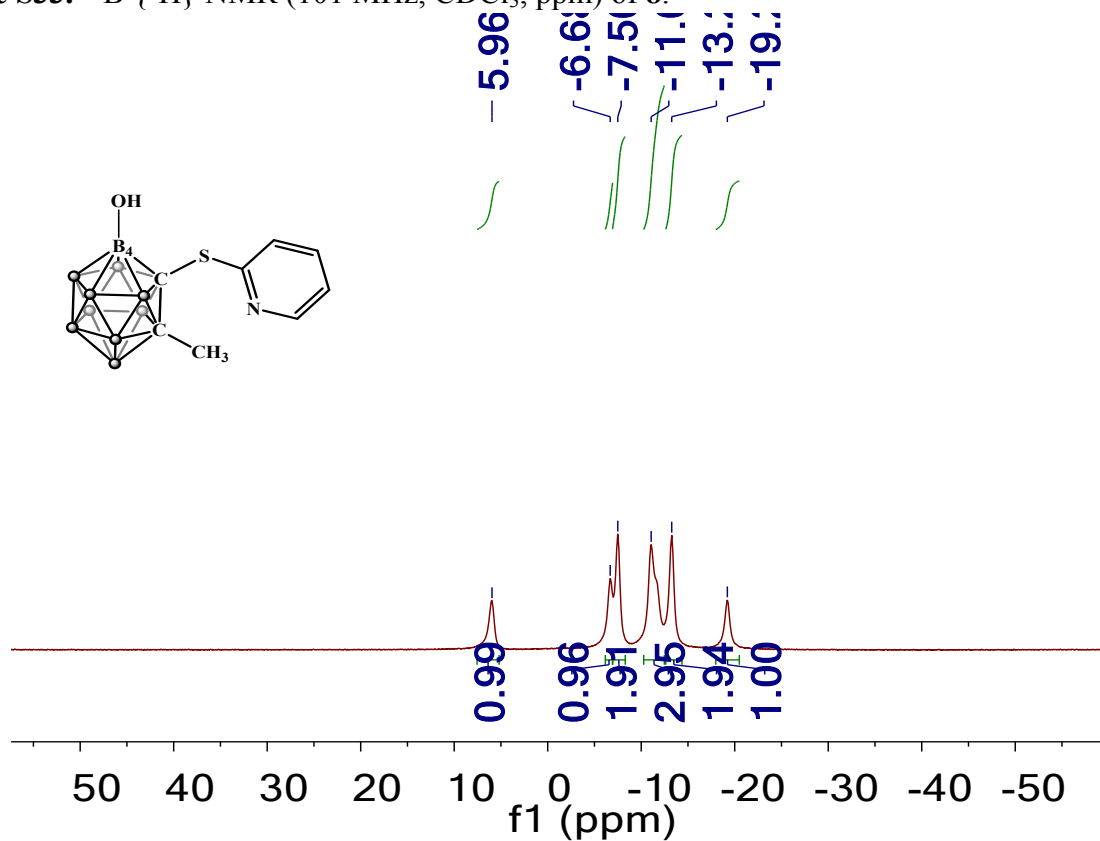

**Figure S34.**  $^1\text{H}$  NMR (400 MHz,  $\text{CDCl}_3$ , ppm) of **8d**.

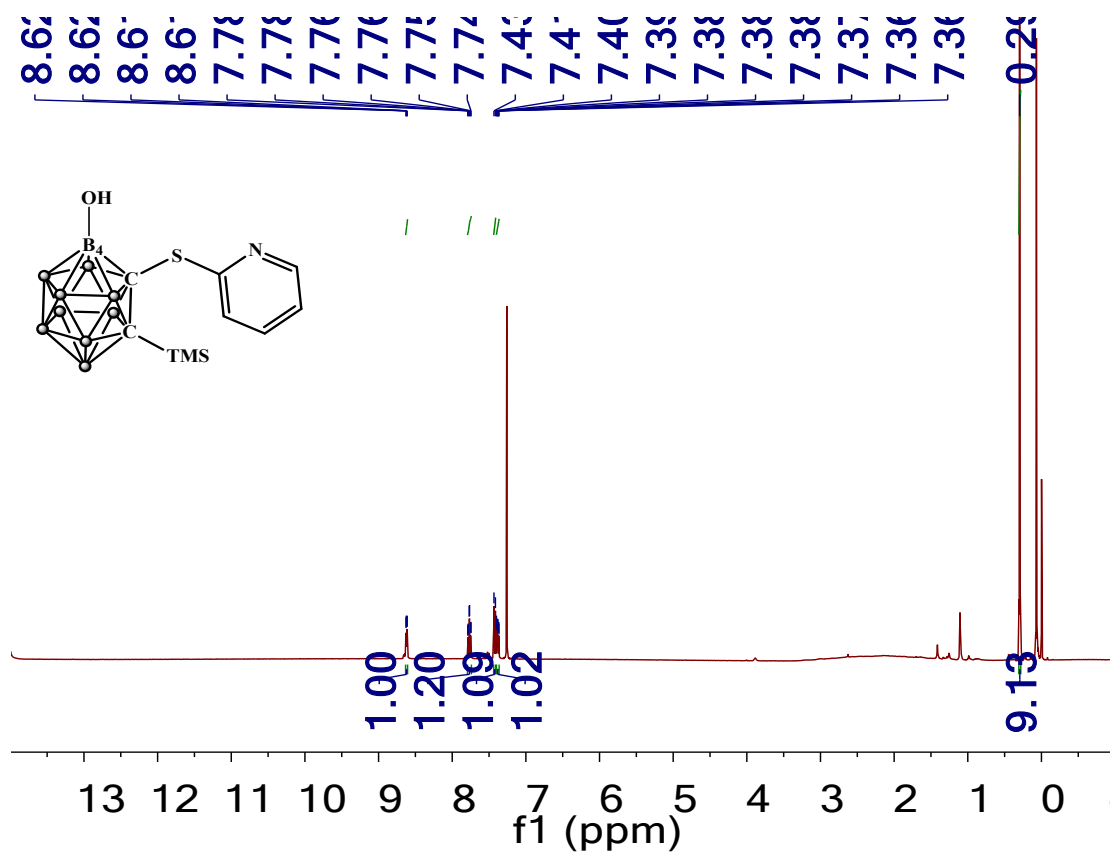

**Figure S35.**  $^{13}\text{C}$   $\{^1\text{H}\}$  NMR (101 MHz,  $\text{CDCl}_3$ , ppm) of **8d**.

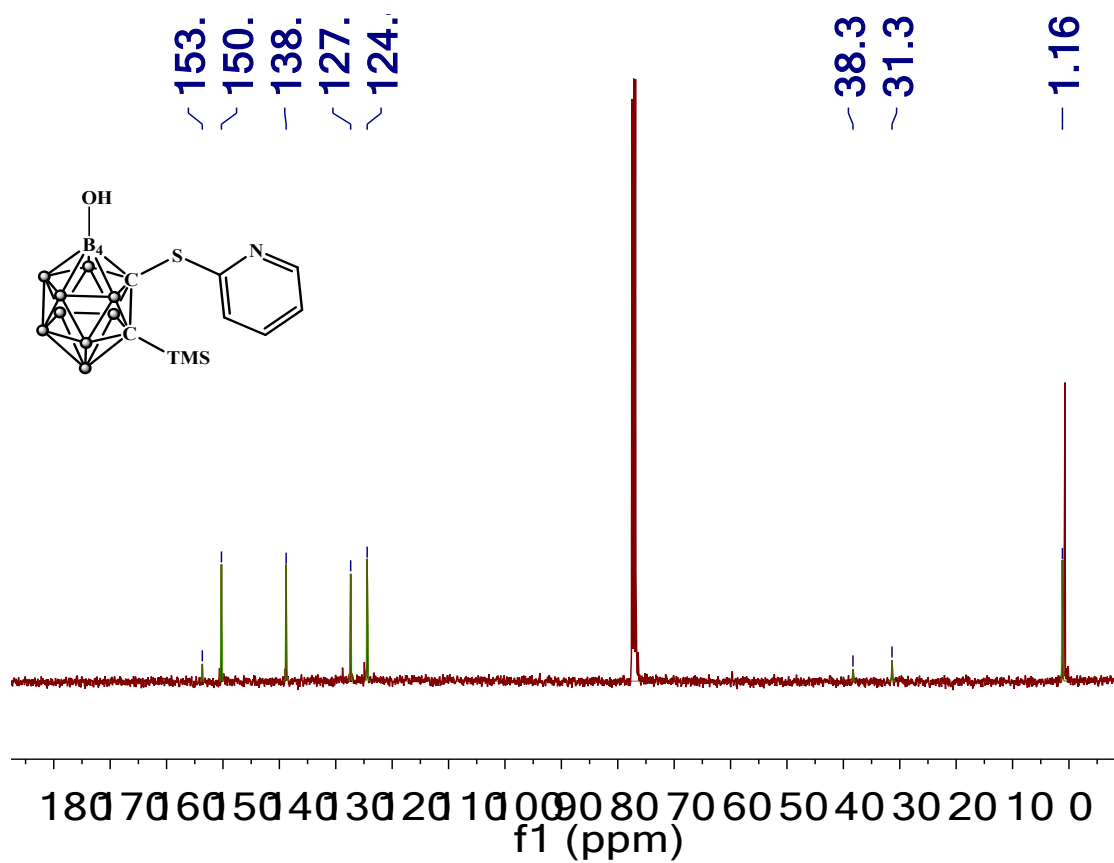

Figure S36. <sup>11</sup>B {<sup>1</sup>H} NMR (101 MHz, CDCl<sub>3</sub>, ppm) of 8d.

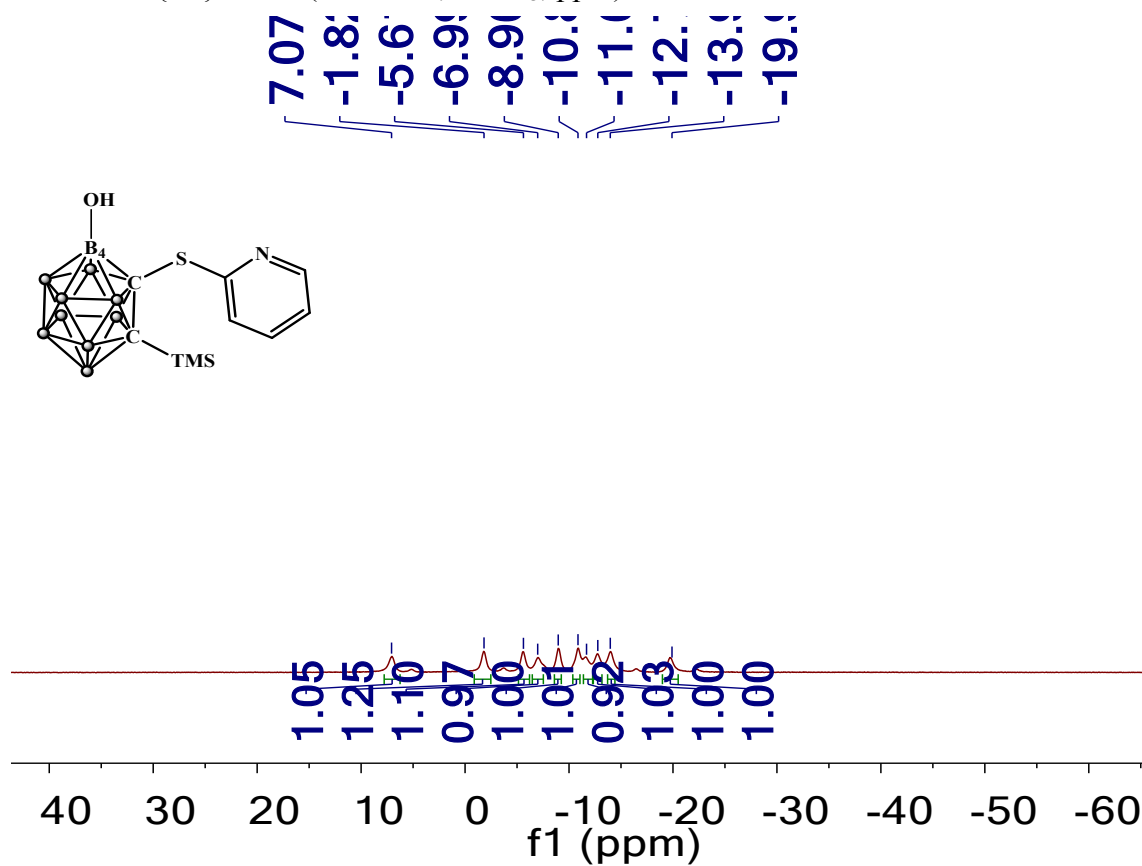

**Figure S37.**  $^1\text{H}$  NMR (400 MHz,  $\text{CDCl}_3$ , ppm) of **9**.

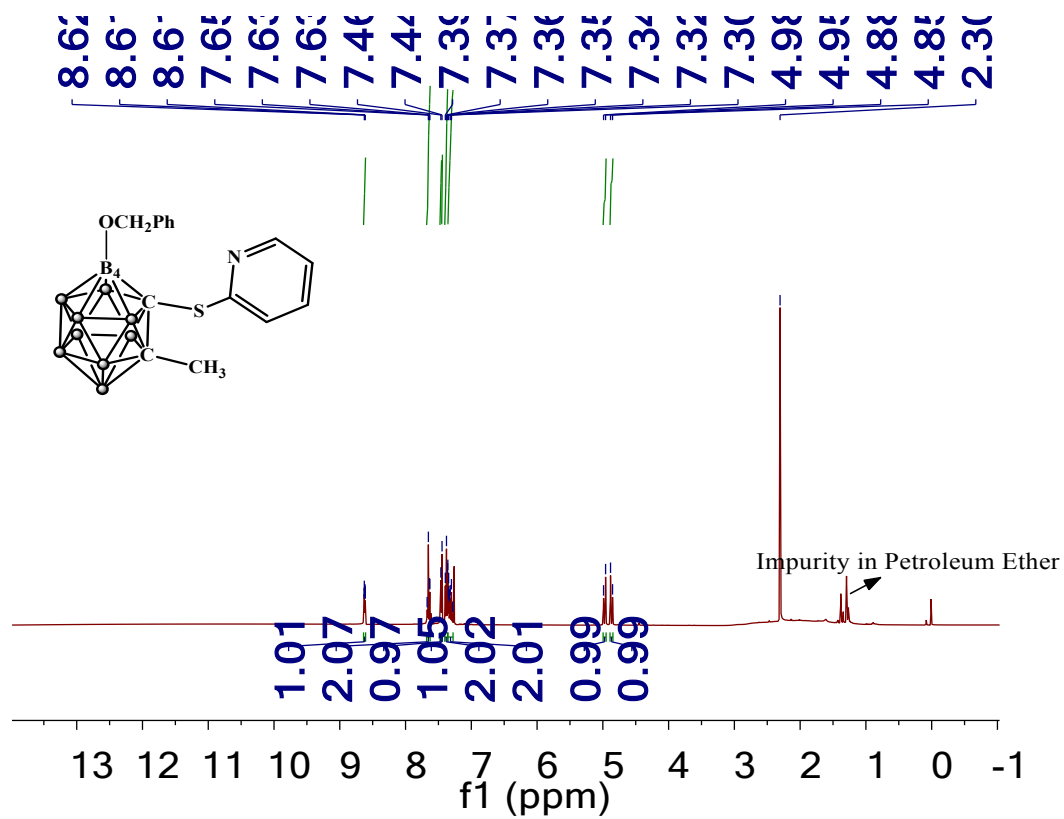

**Figure S38.**  $^{13}\text{C}$   $\{^1\text{H}\}$  NMR (101 MHz,  $\text{CDCl}_3$ , ppm) of **9**.

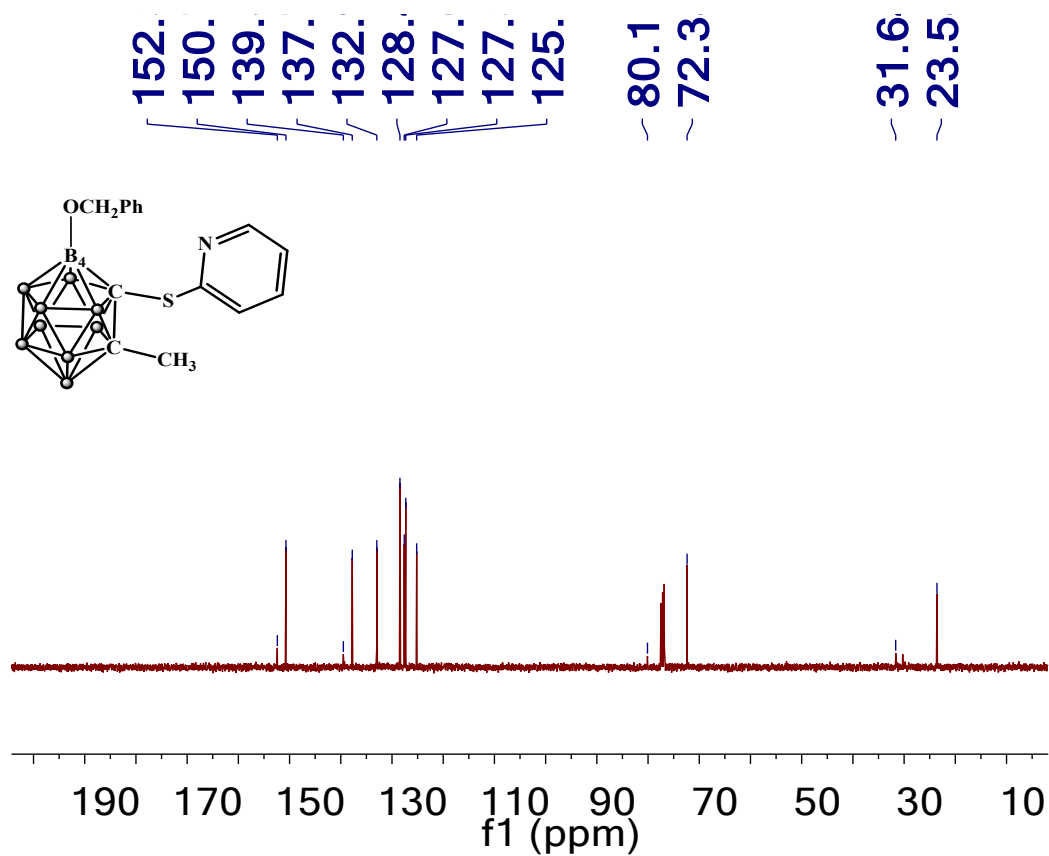

**Figure S39.**  $^{11}\text{B}$   $\{^1\text{H}\}$  NMR (101 MHz,  $\text{CDCl}_3$ , ppm) of **9**.

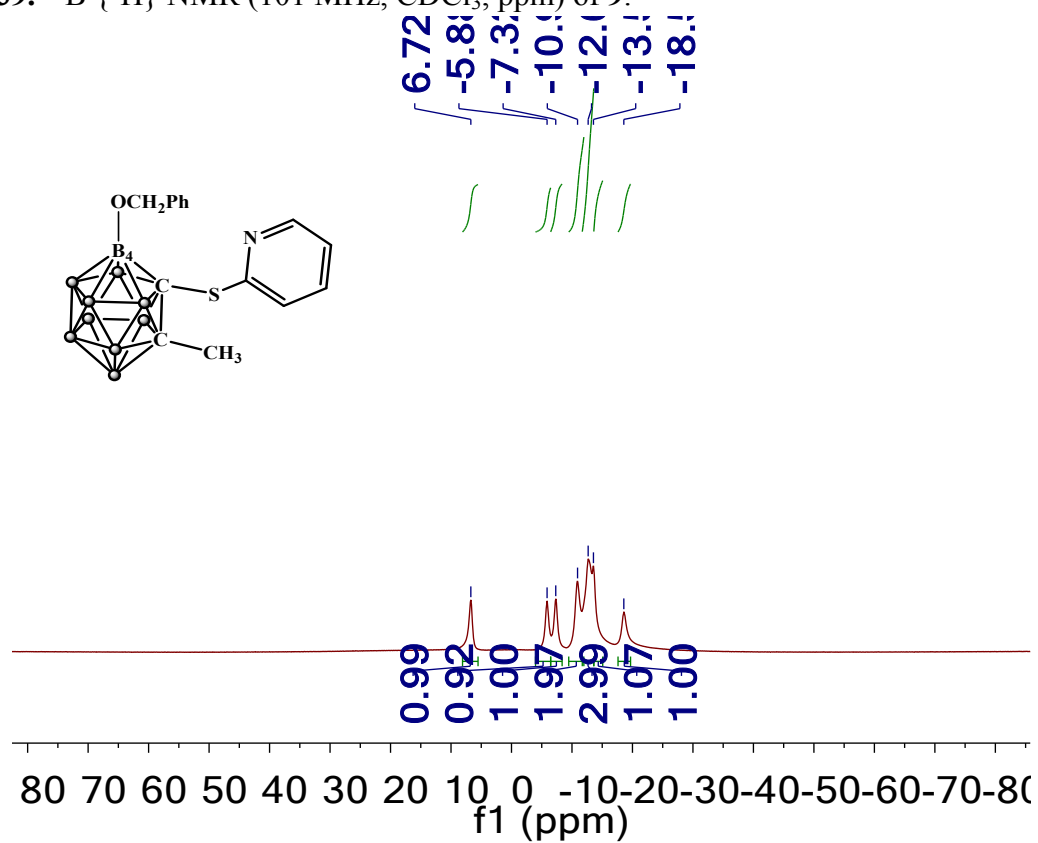

## ESI-MS spectra:

**Figure S40.** Experimental (top) and theoretical (bottom) ESI-MS spectra of complex **1b**.

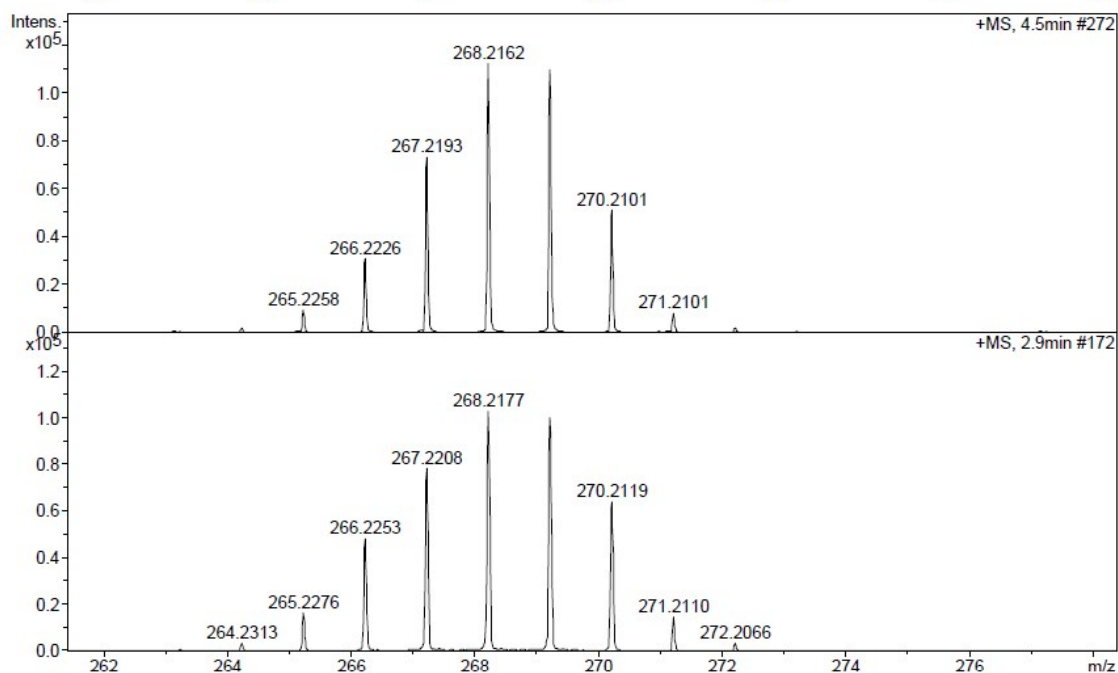

**Figure S41.** Experimental (top) and theoretical (bottom) ESI-MS spectra of complex **1c**.

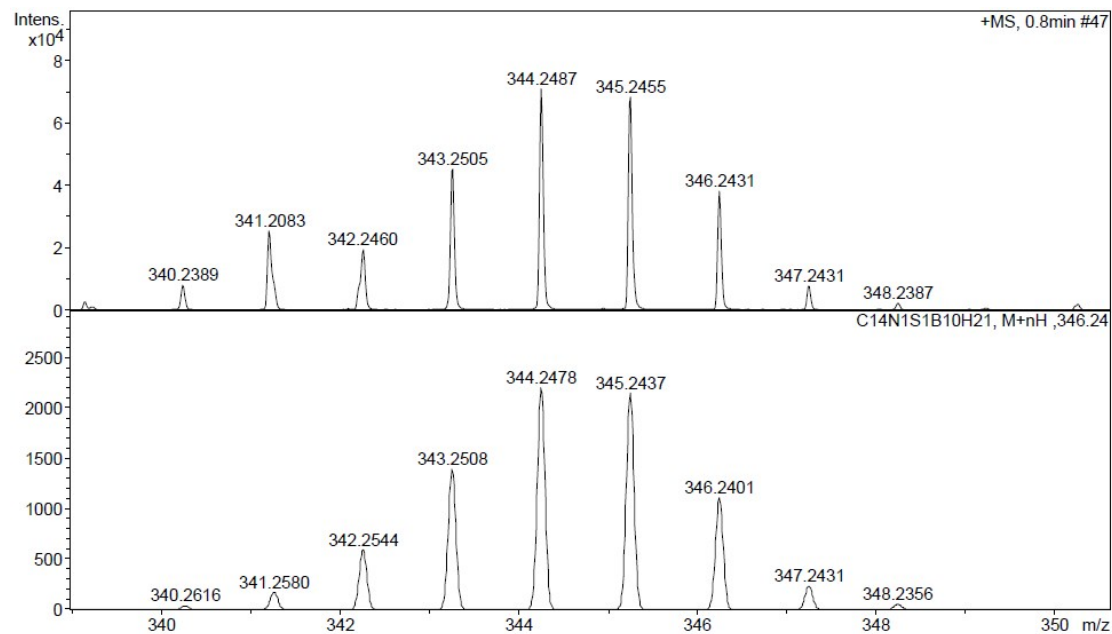

**Figure S42.** Experimental (top) and theoretical (bottom) ESI-MS spectra of complex **6**.

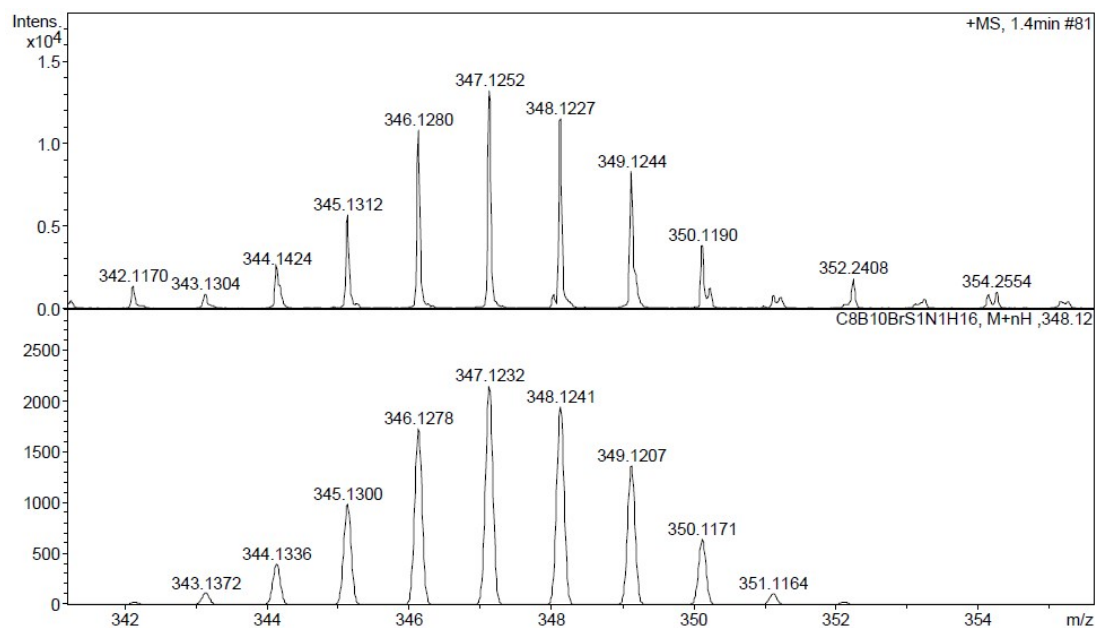

**Figure S43.** Experimental (top) and theoretical (bottom) ESI-MS spectra of complex **7**.

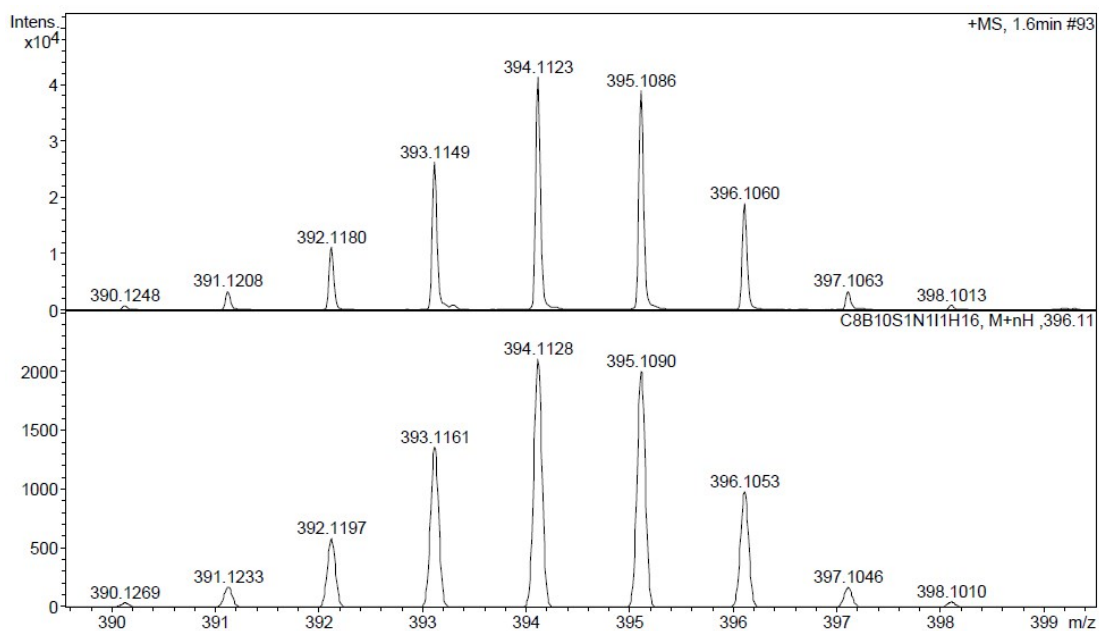

**Figure S44.** Experimental (top) and theoretical (bottom) ESI-MS spectra of complex **6c**.

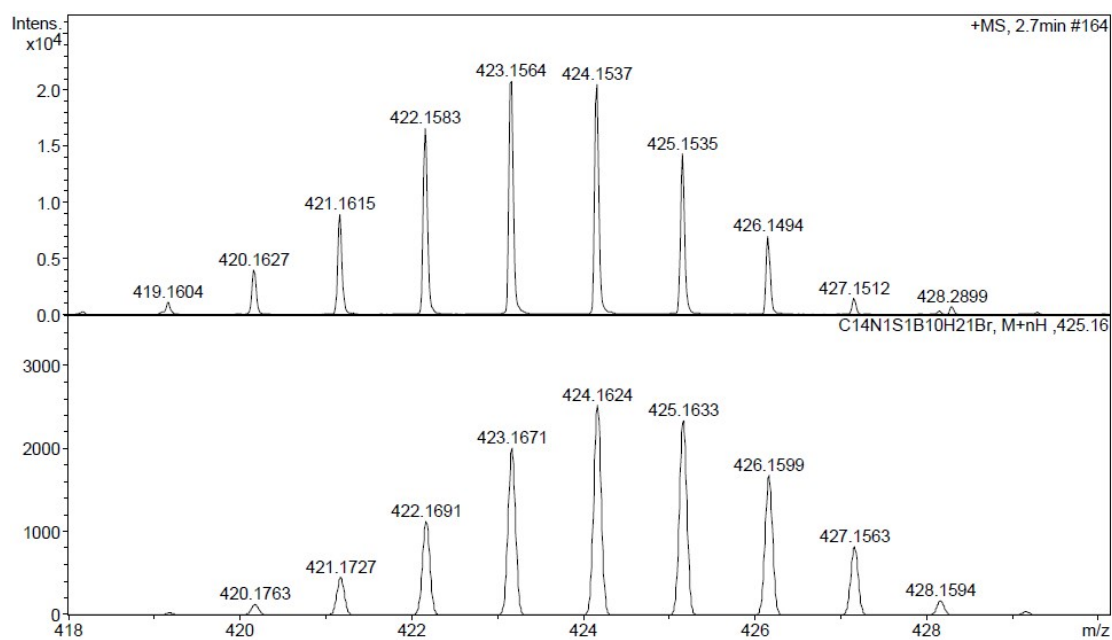

**Figure S45.** Experimental (top) and theoretical (bottom) ESI-MS spectra of complex **8**.

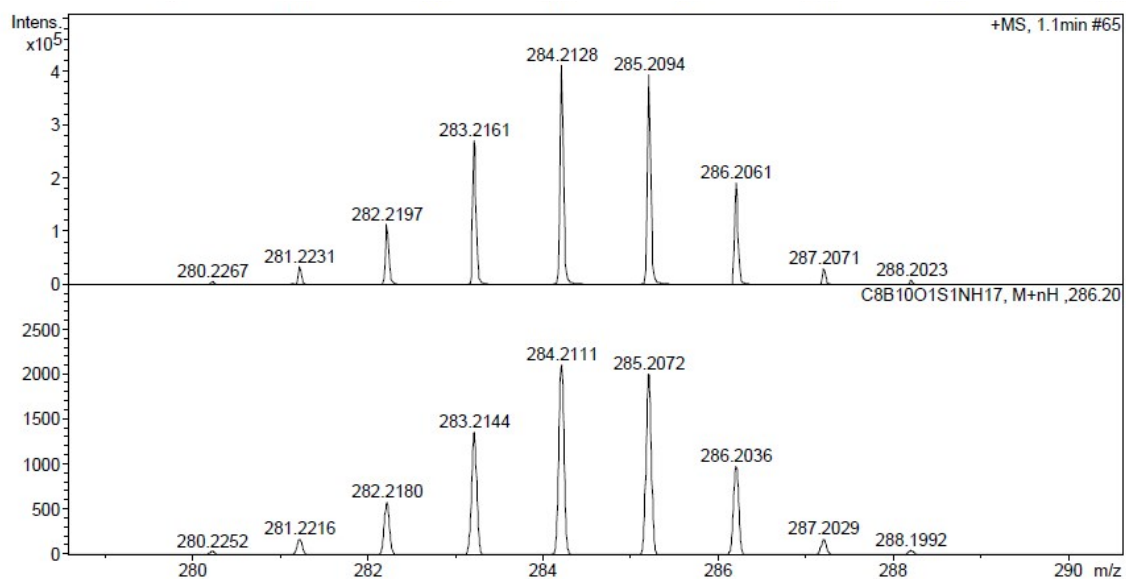

**Figure S46.** Experimental (top) and theoretical (bottom) ESI-MS spectra of complex **8'**. (Using  $^{18}\text{O}_2$ )

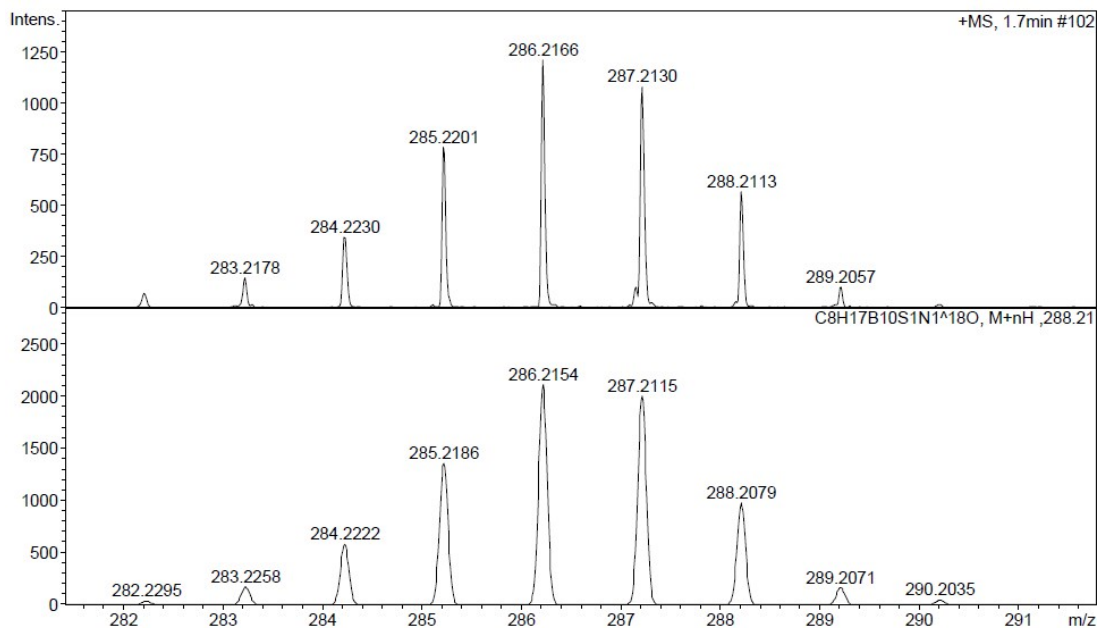

#### Monitoring the reaction for complex **8** by EI-mass:

Compound **1b** (26.8mg, 0.10 mmol),  $[\text{Cp}^*\text{RhCl}_2]_2$  (30.9 mg, 0.05 mmol), AgOTf (51.4 mg, 0.2 mmol), and  $\text{CH}_3\text{COOK}$  (0.1mmol, 10mg) were mixed in  $\text{CH}_2\text{Cl}_2$  (5 mL). After the reaction mixture was cooled to  $-78^\circ\text{C}$ , the reaction tube was evacuated and back-filled with  $\text{O}_2$  (3 times, balloon). The reaction tube was then closed after the reaction temperature was warmed to room temperature. The solution detected by EI-MS at 10min, 25min, 55min, 3h and 15 h.

#### Proposed reaction mechanism.

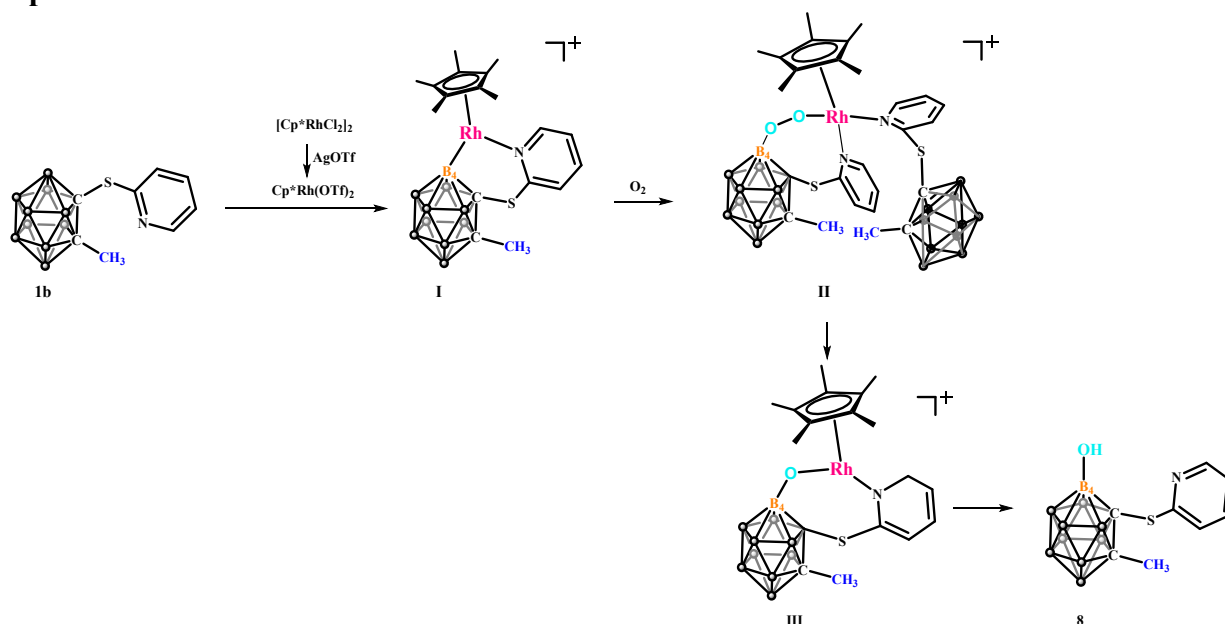

Figure S47. MS data of reaction: (1) 10 min.

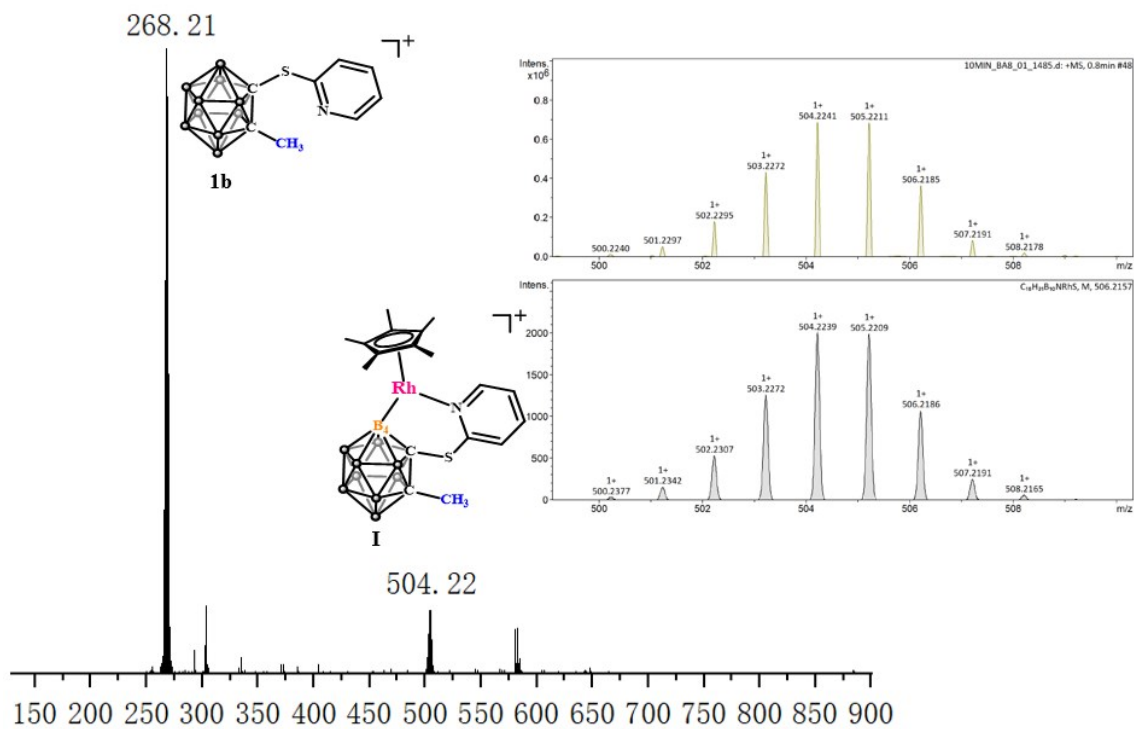

Figure S48. MS data of reaction: (2) 25 min.

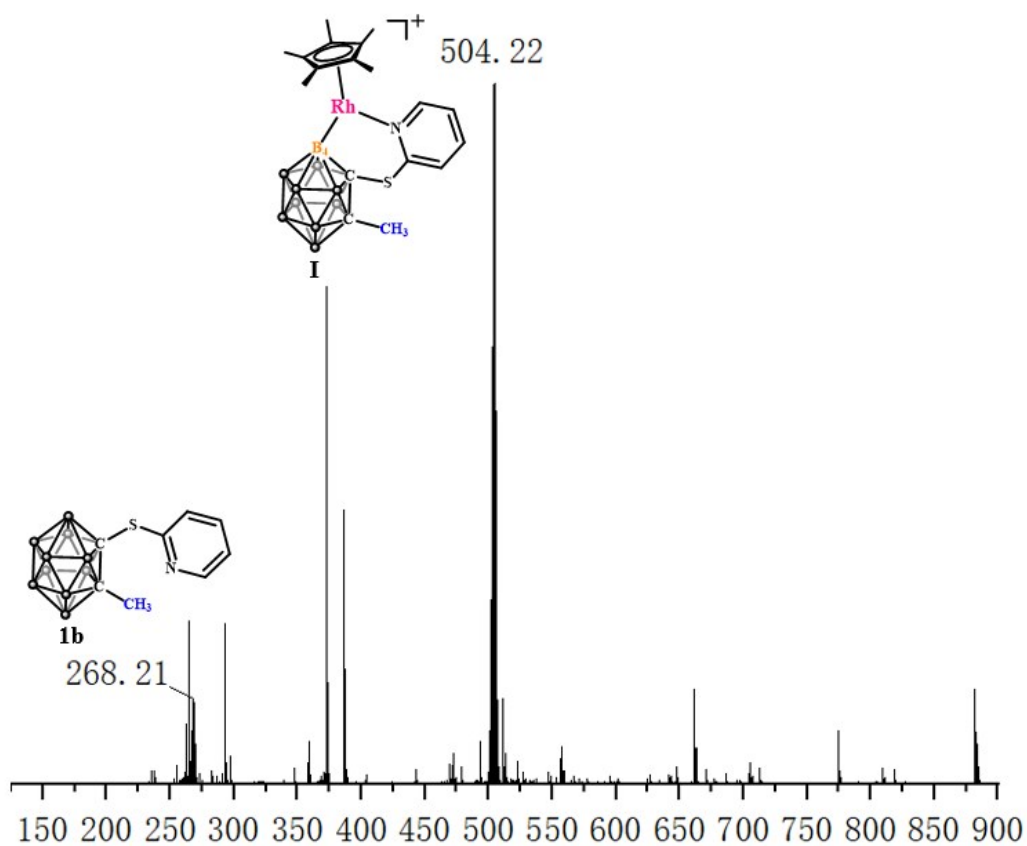

Figure S49. MS data of reaction: (3) 55 min.

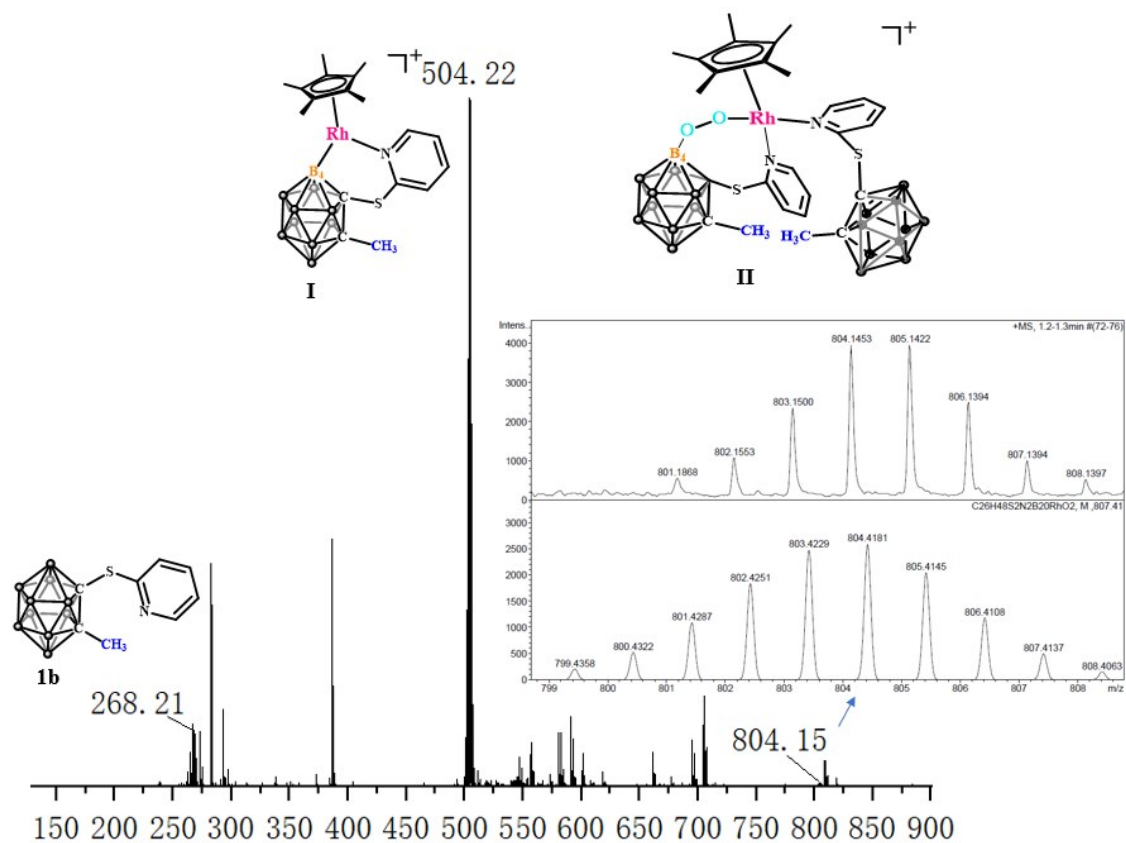

Figure S50. MS data of reaction: (4) 3h.

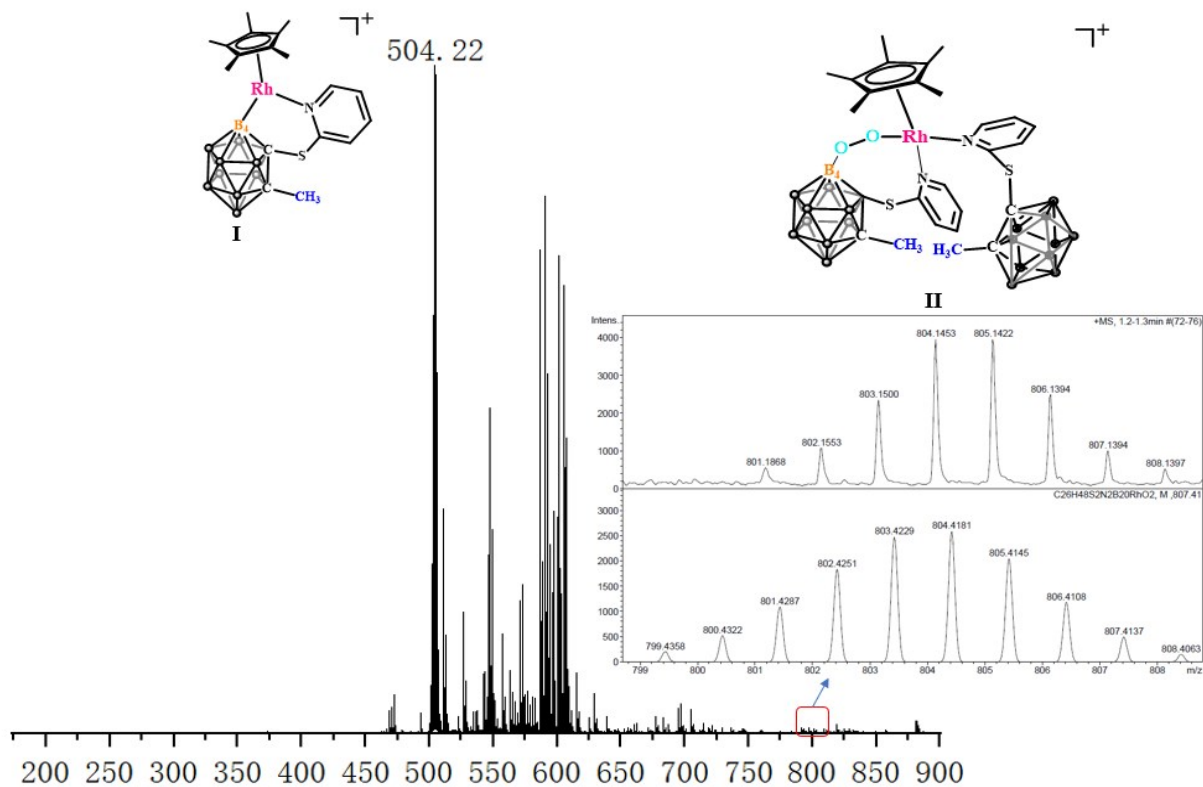

Figure S51. MS data of reaction: (5) 15h.

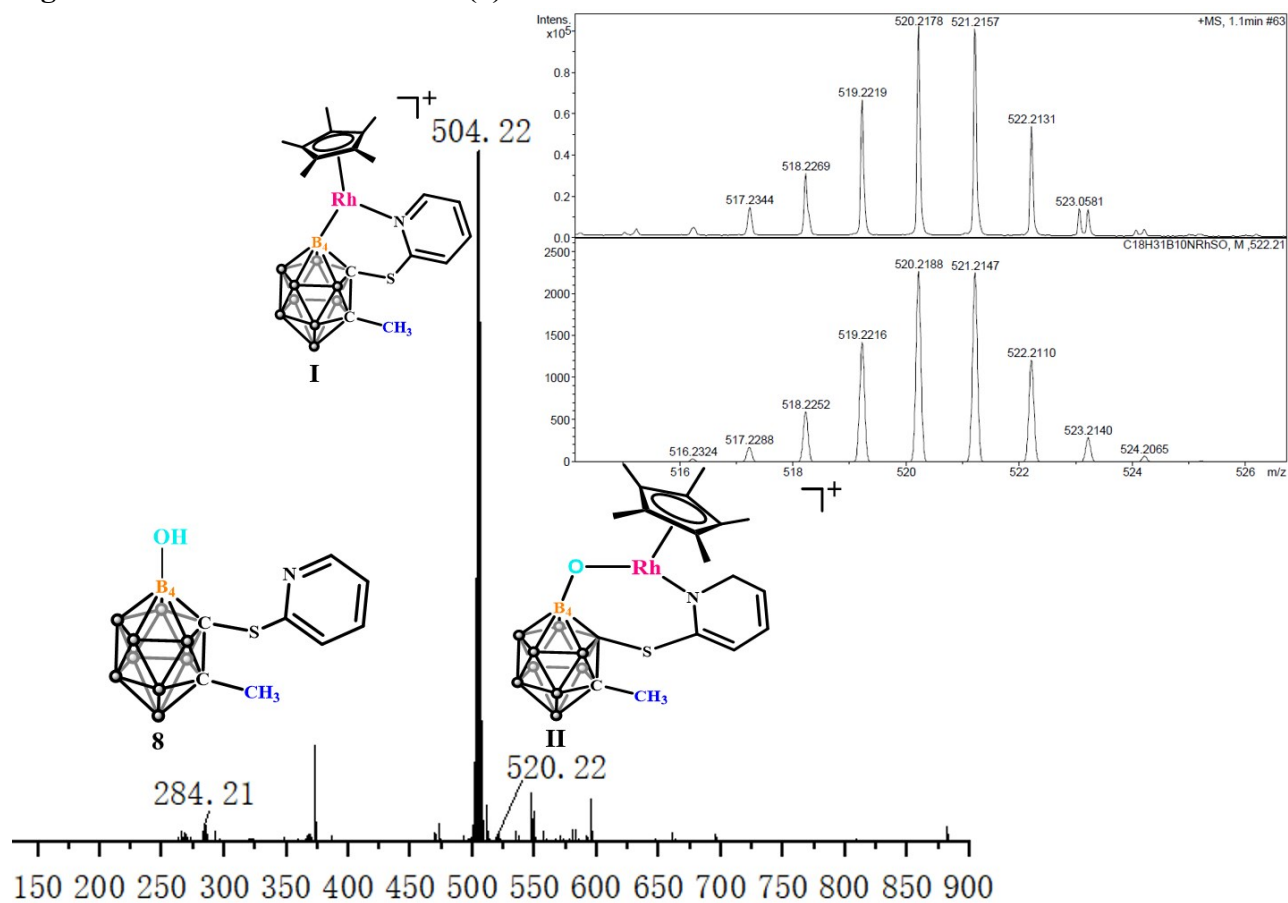

## X-ray crystallography details

X-ray diffraction data of **1b** and **2** were collected on a Bruker D8 Venture system ( $\text{Mo}_{\text{K}\alpha}$ ,  $\lambda = 0.71073$  Å). X-ray diffraction data of **3** were collected on a CCD-Bruker APEX DUO system ( $\text{Mo}_{\text{K}\alpha}$ ,  $\lambda = 0.71073$  Å). X-ray diffraction data of **4**, **5**, **6** and **8** were collected on a Bruker D8 Venture system ( $\text{Ga}_{\text{K}\alpha}$ ,  $\lambda = 1.34138$  Å). X-ray diffraction data of **8d** were collected on a Bruker D8 Venture system ( $\text{Cu}_{\text{K}\alpha}$ ,  $\lambda = 1.54178$  Å). Diffraction data were collected over the full sphere and corrected for absorption. Structure solutions were found with the SHELXS package using direct methods and were refined with the SHELXL program against  $F^2$  using first isotropic and then anisotropic thermal parameters for all non-hydrogen atoms. Hydrogen atoms were placed at calculated positions and included in the structure calculation without further refinement of the parameters. The residual electron densities were of no chemical significance. All calculations were performed using the Bruker Smart program.

In asymmetric unit of **4**, the chloroform molecule was disordered and it was divided into two parts (53:47).

The metallacarborane has mirror symmetry which has a symmetry operator  $x, 1-y, z$ . In asymmetric unit of **8** and **8d**, hydrogen atoms of hydroxy group were found in difference map and others were put in calculated positions.

**Figure S52. Crystal data and structure refinement for compound 1b.**

|                                   |                                                   |
|-----------------------------------|---------------------------------------------------|
| Empirical formula                 | C <sub>8</sub> H <sub>17</sub> B <sub>10</sub> NS |
| Formula weight                    | 267.38                                            |
| Temperature                       | 173(2) K                                          |
| Wavelength                        | 0.71073 Å                                         |
| Crystal system                    | Monoclinic                                        |
| Space group                       | P2 <sub>1</sub> /c                                |
| a                                 | 7.1017(5) Å                                       |
| b                                 | 8.7972(6) Å                                       |
| c                                 | 23.5265(17) Å                                     |
| Volume                            | 1462.15(18) Å <sup>3</sup>                        |
| $\alpha$                          | 90°                                               |
| $\beta$                           | 95.855(3)°                                        |
| $\gamma$                          | 90°                                               |
| Z                                 | 4                                                 |
| Density                           | 1.215 Mg/m <sup>3</sup>                           |
| Absorption coefficient            | 0.197 mm <sup>-1</sup>                            |
| F(000)                            | 552                                               |
| Crystal size                      | 0.180 x 0.140 x 0.060 mm <sup>3</sup>             |
| Theta range for data collection   | 2.473 to 27.139°                                  |
| Index ranges                      | -9 ≤ h ≤ 9, -11 ≤ k ≤ 11, -30 ≤ l ≤ 30            |
| Reflections collected             | 25994                                             |
| Independent reflections           | 3235 [R(int) = 0.0995]                            |
| Completeness to theta = 25.242°   | 99.9 %                                            |
| Absorption correction             | Semi-empirical from equivalents                   |
| Max. and min. transmission        | 0.746 and 0.453                                   |
| Refinement method                 | Full-matrix least-squares on F <sup>2</sup>       |
| Data / restraints / parameters    | 3235 / 3 / 193                                    |
| Goodness-of-fit on F <sup>2</sup> | 1.048                                             |
| Final R indices [I > 2sigma(I)]   | R1 = 0.0407, wR2 = 0.1026                         |
| R indices (all data)              | R1 = 0.0536, wR2 = 0.1112                         |
| Extinction coefficient            | n/a                                               |
| Largest diff. peak and hole       | 0.279 and -0.272 e.Å <sup>-3</sup>                |

**Figure S53. Crystal data and structure refinement for complex 2.**

|                                   |                                                        |
|-----------------------------------|--------------------------------------------------------|
| Empirical formula                 | C <sub>17</sub> H <sub>29</sub> B <sub>10</sub> ClIrNS |
| Formula weight                    | 615.22                                                 |
| Temperature                       | 173K                                                   |
| Wavelength                        | 0.71073 Å                                              |
| Crystal system                    | orthorhombic                                           |
| Space group                       | P2 <sub>1</sub> 2 <sub>1</sub> 2 <sub>1</sub>          |
| a                                 | 8.7616(3)                                              |
| b                                 | 14.8923(7)                                             |
| c                                 | 18.1794(8)                                             |
| Volume                            | 2372.06(17)                                            |
| $\alpha$                          | 90                                                     |
| $\beta$                           | 90                                                     |
| $\gamma$                          | 90                                                     |
| Z                                 | 4                                                      |
| Density                           | 1.723                                                  |
| Absorption coefficient            | 5.836 mm <sup>-1</sup>                                 |
| F(000)                            | 1192                                                   |
| Crystal size                      | 0.21×0.18×0.15                                         |
| Theta range for data collection   | 2.581 to 26.396°                                       |
| Index ranges                      | -10≤h≤10, -17≤k≤18, -22≤l≤22                           |
| Reflections collected             | 25220                                                  |
| Independent reflections           | 4855 [R(int) = 0.0731]                                 |
| Completeness to theta = 25.242°   | 99.90                                                  |
| Absorption correction             | Semi-empirical from equivalents                        |
| Max. and min. transmission        | 0.745 and 0.500                                        |
| Refinement method                 | Full-matrix least-squares on F <sup>2</sup>            |
| Data / restraints / parameters    | 4855 / 2 / 290                                         |
| Absolute structure parameter      | 0.471(9)                                               |
| Goodness-of-fit on F <sup>2</sup> | 1.035                                                  |
| Final R indices [I>2σ(I)]         | R1 = 0.0256, wR2 = 0.0495                              |
| R indices (all data)              | R1 = 0.0290, wR2 = 0.0505                              |
| Extinction coefficient            | n/a                                                    |
| Largest diff. peak and hole       | 0.578 and -1.209 e.Å <sup>-3</sup>                     |

**Figure S54. Crystal data and structure refinement for complex 3.**

|                                   |                                                               |
|-----------------------------------|---------------------------------------------------------------|
| Empirical formula                 | C <sub>18</sub> H <sub>31</sub> B <sub>10</sub> ClIrNS        |
| Formula weight                    | 629.25                                                        |
| Temperature                       | 296.15                                                        |
| Wavelength                        | 0.71073 Å                                                     |
| Crystal system                    | orthorhombic                                                  |
| Space group                       | Pbca                                                          |
| a                                 | 16.183(2)                                                     |
| b                                 | 15.932(2)                                                     |
| c                                 | 19.224(3)                                                     |
| Volume                            | 4956.5(12)                                                    |
| $\alpha$                          | 90                                                            |
| $\beta$                           | 90                                                            |
| $\gamma$                          | 90                                                            |
| Z                                 | 8                                                             |
| Density                           | 1.687 g/cm <sup>3</sup>                                       |
| Absorption coefficient            | 5.588 mm <sup>-1</sup>                                        |
| F(000)                            | 2448.0                                                        |
| Crystal size                      | 0.18 × 0.14 × 0.08                                            |
| Theta range for data collection   | 4.166 to 53.54                                                |
| Index ranges                      | -18 ≤ h ≤ 20, -20 ≤ k ≤ 19, -24 ≤ l ≤ 21                      |
| Reflections collected             | 26427                                                         |
| Independent reflections           | 5285 [R <sub>int</sub> = 0.0696, R <sub>sigma</sub> = 0.0533] |
| Completeness to theta = 26.770°   | 99.9                                                          |
| Absorption correction             | Semi-empirical from equivalents                               |
| Max. and min. transmission        | 0.745 and 0.472                                               |
| Refinement method                 | Full-matrix least-squares on F <sup>2</sup>                   |
| Data / restraints / parameters    | 5285/0/295                                                    |
| Goodness-of-fit on F <sup>2</sup> | 1.034                                                         |
| Final R indices [I > 2sigma(I)]   | R1 = 0.0331, wR2 = 0.0786                                     |
| R indices (all data)              | R1 = 0.0637, wR2 = 0.0948                                     |
| Extinction coefficient            | n/a                                                           |
| Largest diff. peak and hole       | 1.46/-0.81 e.Å <sup>-3</sup>                                  |

**Figure S55. Crystal data and structure refinement for complex 4.**

|                                   |                                                                       |
|-----------------------------------|-----------------------------------------------------------------------|
| Empirical formula                 | C <sub>17</sub> H <sub>29</sub> B <sub>9</sub> NRhS•CHCl <sub>3</sub> |
| Formula weight                    | 599.04                                                                |
| Temperature                       | 173.02K                                                               |
| Wavelength                        | 1.34138 Å                                                             |
| Crystal system                    | monoclinic                                                            |
| Space group                       | C2/m                                                                  |
| a                                 | 17.1460(7) Å                                                          |
| b                                 | 9.4000(4) Å                                                           |
| c                                 | 16.8416(7) Å                                                          |
| Volume                            | 2690.41(19) Å <sup>3</sup>                                            |
| α                                 | 90°                                                                   |
| β                                 | 97.623(2)°                                                            |
| γ                                 | 90°                                                                   |
| Z                                 | 4                                                                     |
| Density                           | 1.479 Mg/m <sup>3</sup>                                               |
| Absorption coefficient            | 5.724 mm <sup>-1</sup>                                                |
| F(000)                            | 1208.0                                                                |
| Crystal size                      | 0.2 × 0.14 × 0.03 mm <sup>3</sup>                                     |
| Theta range for data collection   | 9.054 to 116.908°.                                                    |
| Index ranges                      | -18 ≤ h ≤ 21, -10 ≤ k ≤ 11, -21 ≤ l ≤ 21                              |
| Reflections collected             | 14358                                                                 |
| Independent reflections           | 3069 [R <sub>int</sub> = 0.0650, R <sub>sigma</sub> = 0.0512]         |
| Completeness to theta = 53.594°   | 99.7 %                                                                |
| Absorption correction             | Semi-empirical from equivalents                                       |
| Max. and min. transmission        | 0.7516 and 0.4531                                                     |
| Refinement method                 | Full-matrix least-squares on F <sup>2</sup>                           |
| Data / restraints / parameters    | 3069/62/240                                                           |
| Goodness-of-fit on F <sup>2</sup> | 1.042                                                                 |
| Final R indices [I > 2σ(I)]       | R <sub>1</sub> = 0.0339, wR <sub>2</sub> = 0.0905                     |
| R indices (all data)              | R <sub>1</sub> = 0.0360, wR <sub>2</sub> = 0.0921                     |
| Extinction coefficient            | n/a                                                                   |
| Largest diff. peak and hole       | 1.64 and -0.89 e.Å <sup>-3</sup>                                      |

**Figure S56. Crystal data and structure refinement for complex 5.**

|                                   |                                                        |
|-----------------------------------|--------------------------------------------------------|
| Empirical formula                 | C <sub>18</sub> H <sub>31</sub> B <sub>10</sub> ClNRhS |
| Formula weight                    | 539.96                                                 |
| Temperature                       | 173(2) K                                               |
| Wavelength                        | 1.34138 Å                                              |
| Crystal system                    | Orthorhombic                                           |
| Space group                       | Pbca                                                   |
| a                                 | 15.9981(6) Å                                           |
| b                                 | 15.7969(5) Å                                           |
| c                                 | 19.0542(7) Å                                           |
| Volume                            | 4815.4(3) Å <sup>3</sup>                               |
| α                                 | 90                                                     |
| β                                 | 90                                                     |
| γ                                 | 90                                                     |
| Z                                 | 8                                                      |
| Density                           | 1.490 Mg/m <sup>3</sup>                                |
| Absorption coefficient            | 5.122 mm <sup>-1</sup>                                 |
| F(000)                            | 2192                                                   |
| Crystal size                      | 0.140 x 0.120 x 0.080 mm <sup>3</sup>                  |
| Theta range for data collection   | 3.972 to 55.962°.                                      |
| Index ranges                      | -19 ≤ h ≤ 19, -15 ≤ k ≤ 19, -23 ≤ l ≤ 23               |
| Reflections collected             | 35086                                                  |
| Independent reflections           | 4755 [R(int) = 0.1197]                                 |
| Completeness to theta = 53.594°   | 99.9 %                                                 |
| Absorption correction             | Semi-empirical from equivalents                        |
| Max. and min. transmission        | 0.751 and 0.312                                        |
| Refinement method                 | Full-matrix least-squares on F <sup>2</sup>            |
| Data / restraints / parameters    | 4755 / 60 / 295                                        |
| Goodness-of-fit on F <sup>2</sup> | 1.042                                                  |
| Final R indices [I > 2σ(I)]       | R1 = 0.0497, wR2 = 0.1219                              |
| R indices (all data)              | R1 = 0.0627, wR2 = 0.1323                              |
| Extinction coefficient            | n/a                                                    |
| Largest diff. peak and hole       | 1.145 and -1.515 e.Å <sup>-3</sup>                     |

**Figure S57. Crystal data and structure refinement for complex 6.**

|                                   |                                                               |
|-----------------------------------|---------------------------------------------------------------|
| Empirical formula                 | C <sub>8</sub> H <sub>16</sub> B <sub>10</sub> BrNS           |
| Formula weight                    | 346.29                                                        |
| Temperature                       | 200.01 K                                                      |
| Wavelength                        | 1.54178 Å                                                     |
| Crystal system                    | orthorhombic                                                  |
| Space group                       | P2 <sub>1</sub> 2 <sub>1</sub> 2 <sub>1</sub>                 |
| a                                 | 8.880(3) Å                                                    |
| b                                 | 12.558(3) Å                                                   |
| c                                 | 14.122(3) Å                                                   |
| a                                 | 90°                                                           |
| b                                 | 90°                                                           |
| g                                 | 90°                                                           |
| Volume                            | 1574.7(7) Å <sup>3</sup>                                      |
| Z                                 | 4                                                             |
| Density (calculated)              | 1.461 Mg/m <sup>3</sup>                                       |
| Absorption coefficient            | 3.121 mm <sup>-1</sup>                                        |
| F(000)                            | 688.0                                                         |
| Crystal size                      | 0.12 × 0.11 × 0.08 mm <sup>3</sup>                            |
| Theta range for data collection   | 10.238 to 111.896°.                                           |
| Index ranges                      | -10 ≤ h ≤ 10, -15 ≤ k ≤ 12, -14 ≤ l ≤ 17                      |
| Reflections collected             | 10415                                                         |
| Independent reflections           | 3089 [R <sub>int</sub> = 0.0606, R <sub>sigma</sub> = 0.0582] |
| Absorption correction             | Semi-empirical from equivalents                               |
| Max. and min. transmission        | 0.7512 and 0.4961                                             |
| Refinement method                 | Full-matrix least-squares on F <sup>2</sup>                   |
| Data / restraints / parameters    | 3089/0/192                                                    |
| Absolute structure parameter      | 0.51(5)                                                       |
| Goodness-of-fit on F <sup>2</sup> | 1.022                                                         |
| Final R indices [I > 2σ(I)]       | R <sub>1</sub> = 0.0417, wR <sub>2</sub> = 0.1030             |
| R indices (all data)              | R <sub>1</sub> = 0.0550, wR <sub>2</sub> = 0.1088             |
| Extinction coefficient            | n/a                                                           |
| Largest diff. peak and hole       | 1.05 and -0.36 e.Å <sup>-3</sup>                              |

**Figure S57. Crystal data and structure refinement for complex 8.**

|                                   |                                                    |
|-----------------------------------|----------------------------------------------------|
| Empirical formula                 | C <sub>8</sub> H <sub>17</sub> B <sub>10</sub> NOS |
| Formula weight                    | 283.38                                             |
| Temperature                       | 296(2) K                                           |
| Wavelength                        | 1.34138 Å                                          |
| Crystal system                    | Orthorhombic                                       |
| Space group                       | Pna2 <sub>1</sub>                                  |
| a                                 | 13.0313(7) Å                                       |
| b                                 | 12.7774(7) Å                                       |
| c                                 | 9.0470(4) Å                                        |
| Volume                            | 1506.38(13) Å <sup>3</sup>                         |
| $\alpha$                          | 90°                                                |
| $\beta$                           | 90°                                                |
| $\gamma$                          | 90°                                                |
| Z                                 | 4                                                  |
| Density                           | 1.250 Mg/m <sup>3</sup>                            |
| Absorption coefficient            | 1.150 mm <sup>-1</sup>                             |
| F(000)                            | 584                                                |
| Crystal size                      | 0.370 x 0.140 x 0.120 mm <sup>3</sup>              |
| Theta range for data collection   | 5.212 to 57.051°.                                  |
| Index ranges                      | -15 ≤ h ≤ 16, -15 ≤ k ≤ 15, -9 ≤ l ≤ 11            |
| Reflections collected             | 10291                                              |
| Independent reflections           | 2745 [R(int) = 0.0795]                             |
| Completeness to theta = 53.594°   | 99.7 %                                             |
| Absorption correction             | Semi-empirical from equivalents                    |
| Max. and min. transmission        | 0.751 and 0.590                                    |
| Refinement method                 | Full-matrix least-squares on F <sup>2</sup>        |
| Data / restraints / parameters    | 2745 / 2 / 195                                     |
| Goodness-of-fit on F <sup>2</sup> | 1.049                                              |
| Final R indices [I > 2σ(I)]       | R1 = 0.0397, wR2 = 0.0941                          |
| R indices (all data)              | R1 = 0.0653, wR2 = 0.1042                          |
| Absolute structure parameter      | 0.00(2)                                            |
| Extinction coefficient            | n/a                                                |
| Largest diff. peak and hole       | 0.252 and -0.295 e.Å <sup>-3</sup>                 |

**Figure S58. Crystal data and structure refinement for complex 8d.**

|                                   |                                                       |
|-----------------------------------|-------------------------------------------------------|
| Empirical formula                 | C <sub>10</sub> H <sub>23</sub> B <sub>10</sub> NOSSi |
| Formula weight                    | 341.54                                                |
| Temperature                       | 173(2) K                                              |
| Wavelength                        | 1.54178 Å                                             |
| Crystal system                    | Triclinic                                             |
| Space group                       | P-1                                                   |
| a                                 | 9.6689(5) Å                                           |
| b                                 | 13.6644(8) Å                                          |
| c                                 | 15.5496(8) Å                                          |
| α                                 | 103.901(3)°                                           |
| β                                 | 93.292(3)°                                            |
| γ                                 | 106.301(3)°                                           |
| Volume                            | 1896.81(18) Å <sup>3</sup>                            |
| Z                                 | 4                                                     |
| Density (calculated)              | 1.196 Mg/m <sup>3</sup>                               |
| Absorption coefficient            | 2.055 mm <sup>-1</sup>                                |
| F(000)                            | 712                                                   |
| Crystal size                      | 0.180 x 0.090 x 0.030 mm <sup>3</sup>                 |
| Theta range for data collection   | 2.954 to 71.498°                                      |
| Index ranges                      | -11 ≤ h ≤ 11, -16 ≤ k ≤ 16, -19 ≤ l ≤ 19              |
| Reflections collected             | 73951                                                 |
| Independent reflections           | 7396 [R(int) = 0.0821]                                |
| Completeness to theta = 67.679°   | 100.0 %                                               |
| Absorption correction             | Semi-empirical from equivalents                       |
| Max. and min. transmission        | 0.754 and 0.554                                       |
| Refinement method                 | Full-matrix least-squares on F <sup>2</sup>           |
| Data / restraints / parameters    | 7396 / 2 / 447                                        |
| Goodness-of-fit on F <sup>2</sup> | 1.061                                                 |
| Final R indices [I > 2σ(I)]       | R1 = 0.0402, wR2 = 0.1059                             |
| R indices (all data)              | R1 = 0.0497, wR2 = 0.1124                             |
| Extinction coefficient            | n/a                                                   |
| Largest diff. peak and hole       | 0.297 and -0.425 e.Å <sup>-3</sup>                    |

$\alpha$  :  $R_1 = \Sigma ||F_o| - |F_c|| / \Sigma |F_o|$  (based on reflections with  $F_o^2 > 2\sigma F^2$ ).  $wR_2 = [\Sigma [w(F_o^2 - F_c^2)^2] / \Sigma [w(F_o^2)^2]]^{1/2}$ ;  $w = 1 / [\sigma^2(F_o^2) + (0.095P)^2]$ ;  $P = [\max(F_o^2, 0) + 2F_c^2] / 3(F_o^2 > 2\sigma F^2)$ .

**Figure S59.** Molecular structure of complex **8d**.

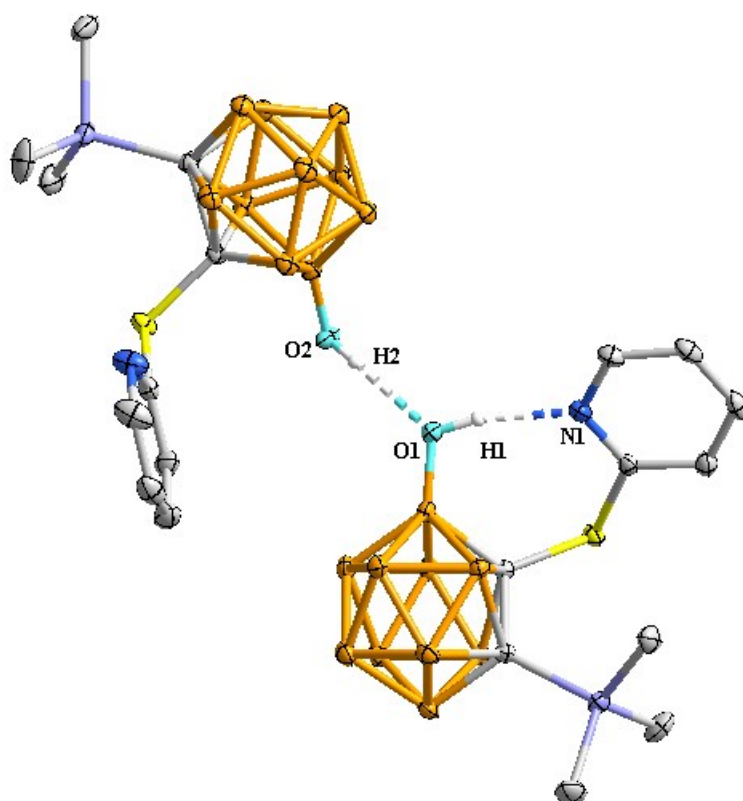

Ellipsoids are set at 30% probability. Color code: O, cyan; S, yellow; N, blue; C, grey; B, orange; Si, light purple; H, white. Some of H atoms have been omitted. The distance of O1-H1...N1 hydrogen bond is 1.858(17) Å. The distance of O2-H2...O1 hydrogen bond is 1.940(17) Å.

## Reference

1. C. White, A. Yates and P. M. Maitlis, *Inorg. Synth.*, 1992, **29**, 228.
2. O. Crespo, M. C. Gimeno and A. Laguna, *Polyhedron*, 1999, **18**, 1279–1283.
